# Supplementary material for: Computational studies on the reactivity of alkyl halides over (Al2O3)nnanoclusters: an approach towards room temperature dehydrohalogenation
Source: Royal Society of Chemistry journal article supplement (doi:10.1039/c6nr00841k), 2016-01-01
Supplement: c6nr00841k1.pdf [file c6nr00841k1.pdf]

# Computational Studies on the Reactivity of Alkyl Halide over $(\text{Al}_2\text{O}_3)_n$ nanoclusters: An Approach towards Room Temperature Dehydrohalogenation

Santu Biswas, Anup Pramanik, and Pranab Sarkar\*

*Department of Chemistry, Visva-Bharati University, Santiniketan- 731235, India*

E-mail: pranab.sarkar@visva-bharati.ac.in

## Supplementary Information:

- **Procedure for VASP calculation.**
- **IRC Plots for the elimination and the dissociative addition reactions.**
- **Comparison between the structural parameters of the bulk  $\text{Al}_2\text{O}_3$  and the  $(\text{Al}_2\text{O}_3)_n$  nanoclusters.**
- **Reaction profile for the elimination reactions of the propyl and isopropyl halides on the dehydrated and hydrated  $\text{Al}_8\text{O}_{12}$  nanocluster.**
- **Cartesian co-ordinates for the optimized geometries of reactant, TS and product along with the lowest harmonic frequency in absence and presence of  $\text{H}_2\text{O}$  (using B3PW91/TZVP, LANL2DZ level of theory).**

## Procedure for VASP calculation:

For comparing the geometry and relative energy of the alumina nanoclusters with that of bulk we reoptimized the cluster geometries obtained from Gaussian outputs using VASP software package<sup>1-4</sup> with a very large supercell. Electron-ion interactions were described by the projector-augmented wave (PAW) method,<sup>5</sup> and the exchange-correlation was treated within the generalized gradient approximation (GGA) proposed by Perdew, Burke, and Ernzerhof (PBE).<sup>6,7</sup> The bulk alumina was also optimized using same level of calculation within the periodic model using 8X8X8 k-grid.

1. G. Kresse and J. Hafner. Ab initio molecular dynamics for liquid metals. *Phys. Rev. B*, 47:558, 1993.
2. G. Kresse and J. Hafner. Ab initio molecular-dynamics simulation of the liquid-metal-amorphous-semiconductor transition in germanium. *Phys. Rev. B*, 49:14251, 1994.
3. G. Kresse and J. Furthmüller. Efficiency of ab-initio total energy calculations for metals and semiconductors using a plane-wave basis set. *Comput. Mat. Sci.*, 6:15, 1996.
4. G. Kresse and J. Furthmüller. Efficient iterative schemes for ab initio total-energy calculations using a plane-wave basis set. *Phys. Rev. B*, 54:11169, 1996.
5. G. Kresse and D. Joubert. From ultrasoft pseudopotentials to the projector augmented-wave method. *Phys. Rev. B*, 59:1758, 1999.
6. J. P. Perdew, K. Burke, and M. Ernzerhof. Generalized gradient approximation made simple. *Phys. Rev. Lett.*, 77:3865, 1996.
7. J. P. Perdew, K. Burke, and M. Ernzerhof. Erratum: Generalized gradient approximation made simple. *Phys. Rev. Lett.*, 78:1396, 1997.

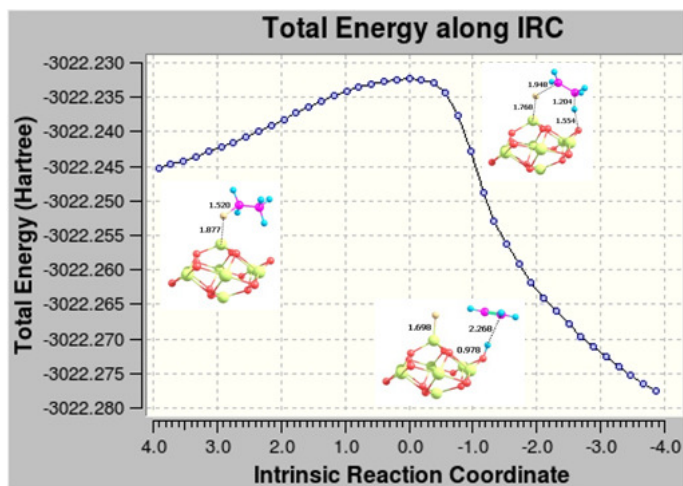

(a)

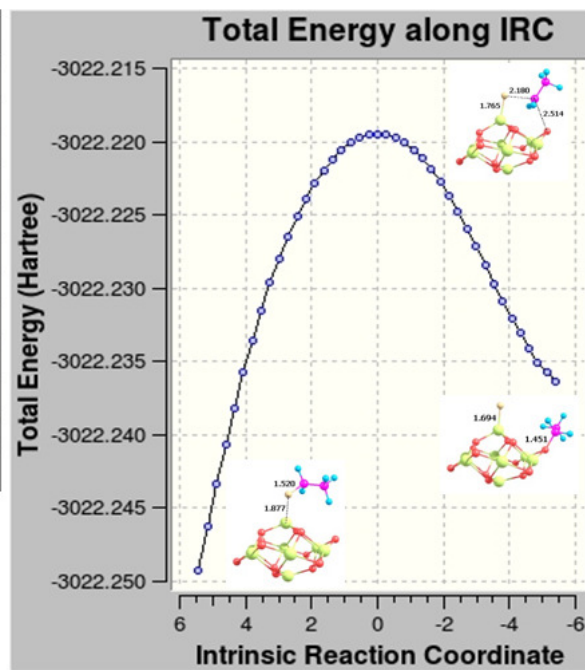

(b)

**Figure S1: IRC plots for (a) elimination and (b) dissociative addition reaction of  $C_2H_5F$  over  $Al_8O_{12}$  nanocluster.**

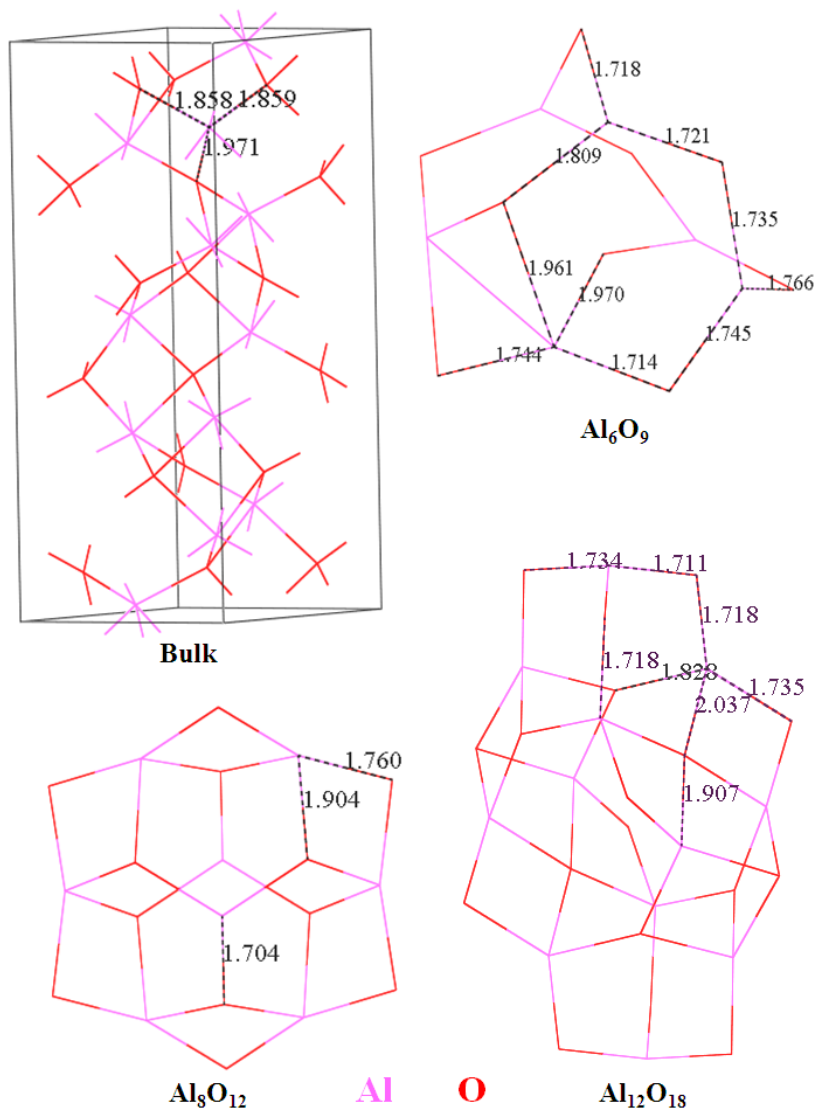

**Figure S2: Comparison between the structural parameters (Al-O bond lengths in Å) of the bulk  $\alpha$ - $\text{Al}_2\text{O}_3$  and the  $\text{Al}_2\text{O}_3$  nanoclusters.**

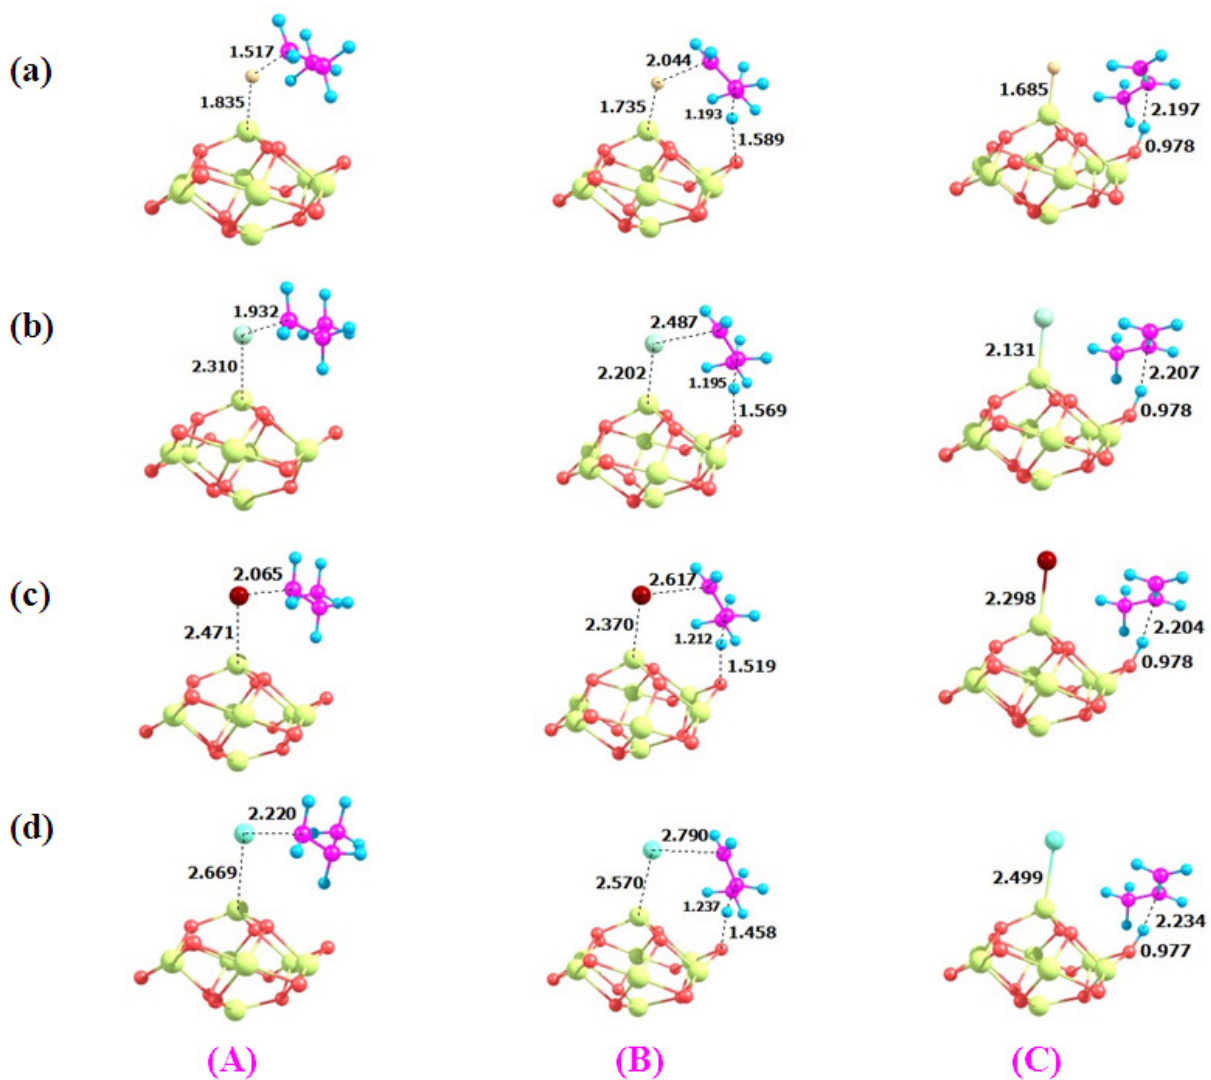

**Figure S3: Reaction profile for the elimination reactions of the propyl halides,  $\text{CH}_3\text{CH}_2\text{CH}_2\text{X}$  ( $\text{X} = \text{F}, \text{Cl}, \text{Br}, \text{I}$ , from top to bottom) on the  $\text{Al}_8\text{O}_{12}$  nanocluster. The interatomic distances are shown in Å.**

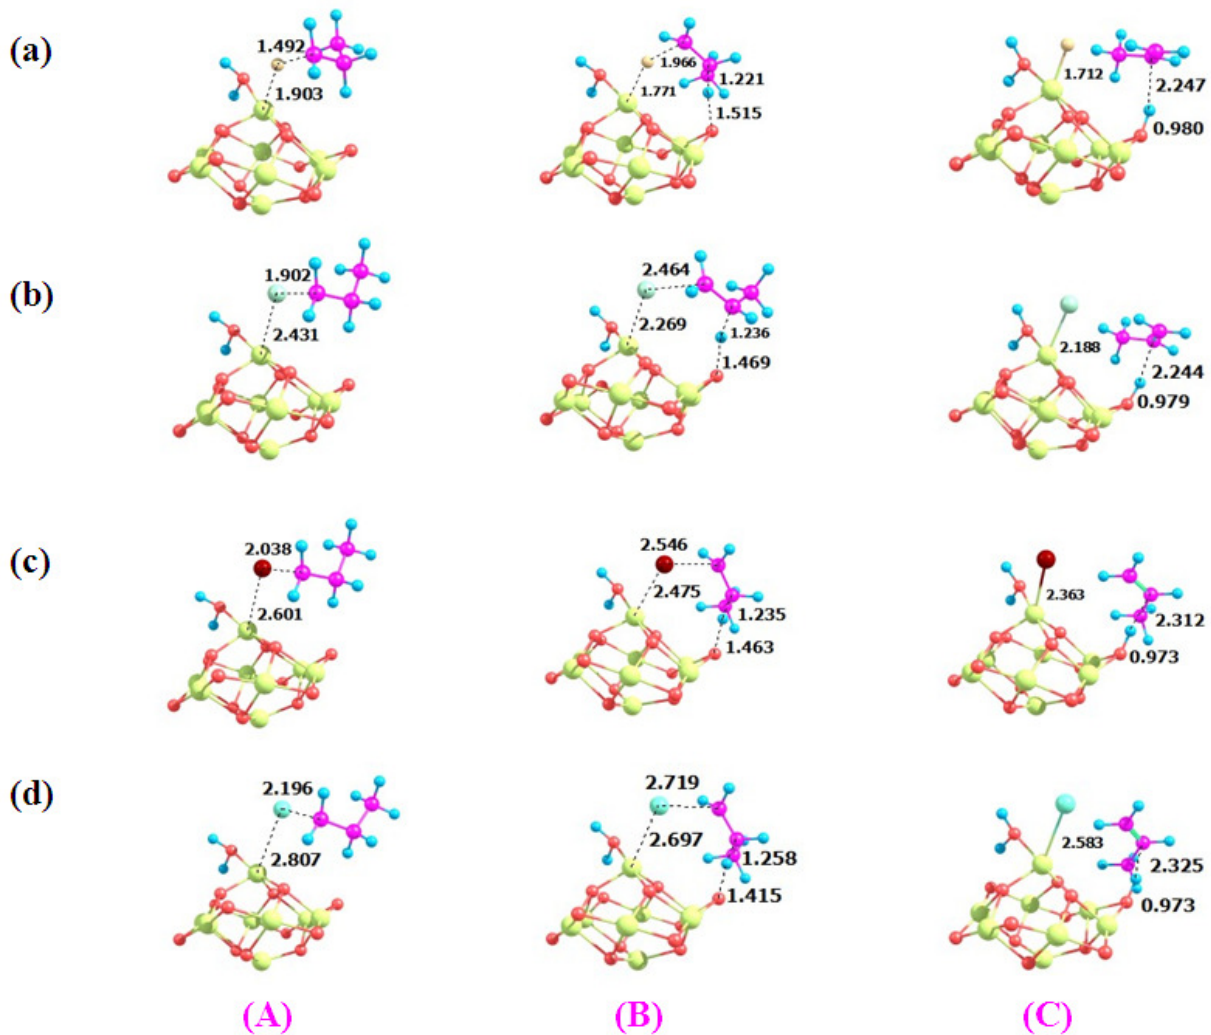

**Figure S4: Reaction profile for the elimination reactions of the propyl halides,  $\text{CH}_3\text{CH}_2\text{CH}_2\text{X}$  ( $\text{X} = \text{F}, \text{Cl}, \text{Br}, \text{I}$ , from top to bottom) on the  $\text{Al}_8\text{O}_{12}$  nanocluster in presence of  $\text{H}_2\text{O}$ . The interatomic distances are shown in Å.**

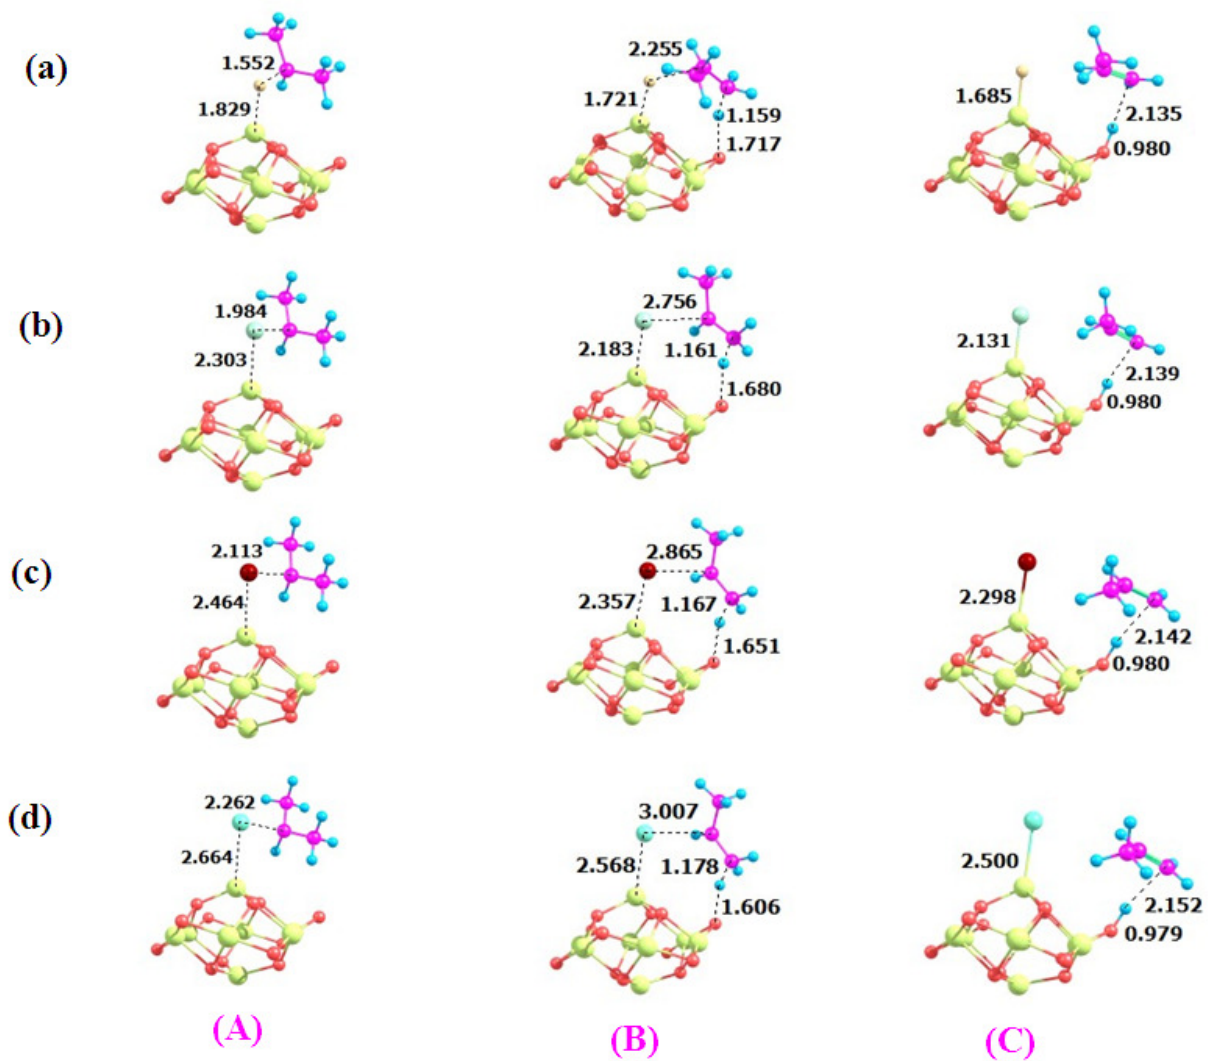

**Figure S5: Reaction profile for the elimination reactions of the iso-propyl halides,  $\text{CH}_3\text{CHXCH}_3$  ( $\text{X} = \text{F, Cl, Br, I}$ , from top to bottom) on the  $\text{Al}_8\text{O}_{12}$  nanocluster. The interatomic distances are shown in Å.**

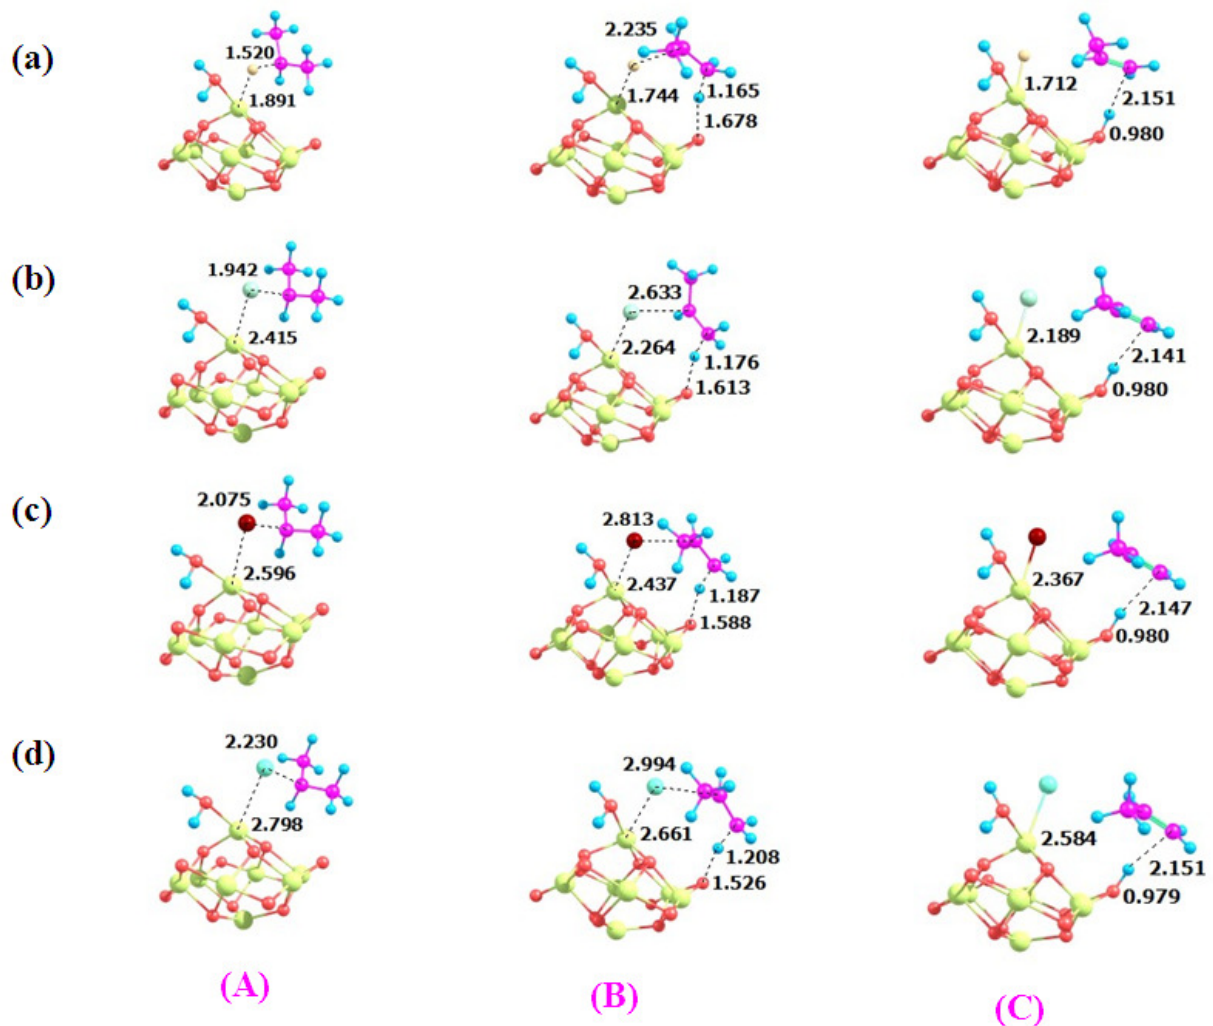

**Figure S6:** Reaction profile for the elimination reactions of the iso-propyl halides,  $\text{CH}_3\text{CHXCH}_3$  ( $\text{X} = \text{F}, \text{Cl}, \text{Br}, \text{I}$ , from top to bottom) on the  $\text{Al}_8\text{O}_{12}$  nanocluster in presence of  $\text{H}_2\text{O}$ . The interatomic distances are shown in Å.



## Completely dehydrated alumina clusters-

$\text{Al}_8\text{O}_{12}\text{---C}_2\text{H}_5\text{F}$  reactant geometry:

$\nu_1=31.52\text{ cm}^{-1}$

0 1

|    |             |             |             |
|----|-------------|-------------|-------------|
| O  | 1.00160700  | -0.34380400 | 1.63070200  |
| O  | 0.99726300  | -3.10980500 | 0.70556300  |
| Al | -0.63468900 | -0.05186100 | 1.18541800  |
| Al | 2.38433700  | 0.85093300  | 1.16156900  |
| O  | -0.19040600 | 0.38683100  | -2.26079600 |
| O  | -0.17794600 | 3.15217200  | -1.29526500 |
| Al | -1.55301500 | -0.82197400 | -1.73716100 |
| O  | 1.60483900  | -1.49677200 | -1.05675500 |
| O  | -0.95713200 | -2.43788500 | -2.10460000 |
| Al | 0.76784500  | 2.55971300  | 0.07326800  |
| O  | 3.38686600  | -0.59622500 | 1.07702000  |
| O  | 2.00469200  | 1.31277500  | -0.65199100 |
| Al | 1.37289100  | 0.08386000  | -1.64472400 |
| Al | 2.02918900  | -1.68269100 | 0.79540200  |
| O  | -2.56681800 | 0.62286200  | -1.62446100 |
| O  | -1.14242700 | -1.25361600 | 0.04585300  |
| Al | -1.20239900 | 1.72141500  | -1.36510100 |
| Al | 0.05890000  | -2.52262000 | -0.66350400 |
| O  | -0.74382800 | 1.49863800  | 0.43532900  |
| O  | 1.77760300  | 2.46701700  | 1.51292800  |
| C  | -4.10489100 | 0.38292800  | 1.63449800  |
| H  | -4.09595000 | 1.36507300  | 2.10779700  |
| H  | -5.14446200 | 0.04043300  | 1.58853000  |
| H  | -3.73300600 | 0.45404000  | 0.60829000  |
| C  | -3.35863600 | -0.62027800 | 2.43932600  |
| H  | -3.26347300 | -1.59982600 | 1.97763800  |
| H  | -3.63912400 | -0.68436100 | 3.48651700  |
| F  | -1.91078700 | -0.17187200 | 2.55698800  |

$\text{Al}_8\text{O}_{12}\text{---C}_2\text{H}_5\text{F}$  TS1 geometry:

$\nu_1=-380.86\text{ cm}^{-1}$

0 1

|    |             |             |             |
|----|-------------|-------------|-------------|
| O  | 1.19295500  | -0.06793500 | 1.59285100  |
| O  | 1.47916500  | -2.92124900 | 0.97219900  |
| Al | -0.53033700 | -0.00916900 | 1.35950500  |
| Al | 2.38298000  | 1.20091900  | 0.88534200  |
| O  | -0.43343700 | 0.07604000  | -2.20440300 |

|    |             |             |             |
|----|-------------|-------------|-------------|
| O  | -0.61686700 | 2.93705800  | -1.54024500 |
| Al | -1.51526100 | -1.22637400 | -1.39079900 |
| O  | 1.70611000  | -1.45745300 | -1.00524300 |
| O  | -0.79196100 | -2.79843500 | -1.68083900 |
| Al | 0.51858000  | 2.60730700  | -0.21513800 |
| O  | 3.54392000  | -0.12226500 | 0.84767600  |
| O  | 1.79863700  | 1.41512200  | -0.93726500 |
| Al | 1.21152400  | 0.01374900  | -1.69694700 |
| Al | 2.30282100  | -1.37069800 | 0.82363700  |
| O  | -2.71132300 | 0.12048800  | -1.24169900 |
| O  | -0.89179500 | -1.37586400 | 0.32411100  |
| Al | -1.43734000 | 1.40108300  | -1.32446600 |
| Al | 0.35691300  | -2.60399700 | -0.34111000 |
| O  | -0.79765800 | 1.42208200  | 0.38888900  |
| O  | 1.65625600  | 2.78976800  | 1.11057200  |
| C  | -4.19752300 | 0.12058300  | 1.06218700  |
| H  | -4.66887700 | 1.09669600  | 0.95772200  |
| H  | -4.82690000 | -0.70225300 | 0.70906900  |
| H  | -3.42360900 | 0.09587400  | 0.13956100  |
| C  | -3.71387400 | -0.14359700 | 2.36632500  |
| H  | -3.63654100 | -1.16409500 | 2.71886900  |
| H  | -3.75380300 | 0.61269200  | 3.13843200  |
| F  | -1.78470600 | -0.01181800 | 2.60579100  |

**Al<sub>8</sub>O<sub>12</sub>---C<sub>2</sub>H<sub>5</sub>F product-1 geometry:**  
 **$\nu_1=26.56 \text{ cm}^{-1}$**

|     |             |             |             |
|-----|-------------|-------------|-------------|
| 0 1 |             |             |             |
| O   | 1.38410900  | 0.00298600  | 1.47633100  |
| O   | 1.76426600  | -2.83757500 | 0.93907600  |
| Al  | -0.36828500 | -0.02225500 | 1.53542700  |
| Al  | 2.45889400  | 1.30752800  | 0.71123900  |
| O   | -0.59683400 | 0.01128500  | -2.08660800 |
| O   | -0.80260000 | 2.90745400  | -1.45177400 |
| Al  | -1.46280900 | -1.36607100 | -1.19381100 |
| O   | 1.72209700  | -1.41652700 | -1.09025600 |
| O   | -0.72069800 | -2.90218800 | -1.51014600 |
| Al  | 0.43918200  | 2.62153900  | -0.20248100 |
| O   | 3.67561600  | 0.04479900  | 0.56070600  |
| O   | 1.68159000  | 1.48372800  | -1.06130900 |
| Al  | 1.10889700  | 0.03164400  | -1.72017900 |
| Al  | 2.49529200  | -1.25473200 | 0.68542100  |
| O   | -2.78924100 | -0.02942900 | -1.10514600 |
| O   | -0.75514700 | -1.38823300 | 0.45189200  |
| Al  | -1.50087900 | 1.34501500  | -1.16714200 |

|    |             |             |             |
|----|-------------|-------------|-------------|
| Al | 0.51337700  | -2.60645800 | -0.25531500 |
| O  | -0.79418000 | 1.35321100  | 0.47907200  |
| O  | 1.68313500  | 2.86341100  | 0.99694700  |
| C  | -5.14363300 | 0.42532400  | 1.05716200  |
| H  | -4.91151700 | 1.47246800  | 1.22723300  |
| H  | -6.00361800 | 0.21326800  | 0.42917700  |
| H  | -3.49352700 | -0.04454600 | -0.42608200 |
| C  | -4.44229300 | -0.54307600 | 1.64189800  |
| H  | -4.70604200 | -1.58802100 | 1.50618500  |
| H  | -3.60383200 | -0.33399500 | 2.30052700  |
| F  | -1.25227800 | -0.05408600 | 2.98524900  |

**A<sub>18</sub>O<sub>12</sub>---C<sub>2</sub>H<sub>5</sub>Cl reactant geometry:**  
**v<sub>1</sub>=31.98 cm<sup>-1</sup>**

|     |             |             |             |
|-----|-------------|-------------|-------------|
| 0 1 |             |             |             |
| O   | 0.46127900  | -1.56277100 | 0.50659800  |
| O   | -1.99231700 | -1.95941700 | 2.02266400  |
| Al  | 0.67668300  | 0.07390100  | 1.01288200  |
| Al  | 0.61330000  | -2.09388400 | -1.28231000 |
| O   | -1.64839200 | 1.54504100  | -1.13711500 |
| O   | 0.84191800  | 1.91420100  | -2.62295500 |
| Al  | -1.76895100 | 2.04079500  | 0.70411700  |
| O   | -2.36732600 | -1.08996100 | -0.25150600 |
| O   | -3.20919400 | 1.23213900  | 1.31632700  |
| Al  | 1.25027100  | 0.28586300  | -2.09145900 |
| O   | -0.58031600 | -3.31852900 | -0.86527500 |
| O   | -0.32529300 | -0.74618800 | -2.24195500 |
| Al  | -1.72408600 | -0.11898600 | -1.49123300 |
| Al  | -1.22252400 | -2.40676900 | 0.50390800  |
| O   | -0.57049000 | 3.25922500  | 0.26813300  |
| O   | -0.82845100 | 0.67735300  | 1.59451600  |
| Al  | 0.06516500  | 2.35252400  | -1.09964600 |
| Al  | -2.41719500 | -0.33208400 | 1.49860000  |
| O   | 1.17441000  | 1.01420800  | -0.35658700 |
| O   | 2.06173200  | -1.27155600 | -1.88611400 |
| C   | 4.43183900  | -0.53492500 | 0.60454300  |
| H   | 4.74304700  | -1.33769600 | 1.27317100  |
| H   | 5.30921500  | -0.22634900 | 0.02287700  |
| H   | 3.68470900  | -0.89876900 | -0.10585700 |
| C   | 3.97914300  | 0.67356000  | 1.35046300  |
| H   | 3.55423100  | 1.45916900  | 0.73367800  |
| H   | 4.67910400  | 1.06076100  | 2.08398800  |
| Cl  | 2.48698300  | 0.24373200  | 2.51030100  |

**Al<sub>8</sub>O<sub>12</sub>---C<sub>2</sub>H<sub>5</sub>Cl TS1 geometry:**  
**v1=-317.38 cm<sup>-1</sup>**

|     |             |             |             |
|-----|-------------|-------------|-------------|
| 0 1 |             |             |             |
| O   | 0.66741400  | 1.45058500  | -0.25268400 |
| O   | -1.74662700 | 2.67356600  | -1.32003900 |
| Al  | 0.56912700  | -0.01450200 | -1.20088700 |
| Al  | 1.08470500  | 1.52326700  | 1.52901000  |
| O   | -1.86230800 | -1.49707400 | 0.93130600  |
| O   | 0.59544600  | -2.68650500 | 1.94810700  |
| Al  | -2.24009000 | -1.49939500 | -0.95598200 |
| O   | -2.08313700 | 1.36547900  | 0.74739700  |
| O   | -3.52557800 | -0.31590100 | -1.17160500 |
| Al  | 1.26983500  | -1.08666600 | 1.70036600  |
| O   | 0.17381600  | 3.02132700  | 1.57658500  |
| O   | 0.03087600  | 0.17875100  | 2.32156300  |
| Al  | -1.53699000 | 0.01894400  | 1.62758900  |
| Al  | -0.77140500 | 2.59039500  | 0.13764500  |
| O   | -1.32628700 | -3.00618700 | -0.94938100 |
| O   | -1.10722900 | -0.16744200 | -1.63121000 |
| Al  | -0.38625100 | -2.58992200 | 0.47318100  |
| Al  | -2.43089300 | 1.06275800  | -1.12175800 |
| O   | 0.88869200  | -1.32324700 | -0.08180600 |
| O   | 2.41292900  | 0.30935900  | 1.68537800  |
| C   | 4.43840800  | 0.23576000  | -0.17606400 |
| H   | 4.87146400  | 1.23171700  | -0.11591100 |
| H   | 4.96786600  | -0.49628500 | 0.44920200  |
| H   | 3.46431500  | 0.24953700  | 0.51000900  |
| C   | 4.33260200  | -0.28142600 | -1.49019000 |
| H   | 4.20829100  | -1.34652800 | -1.64466700 |
| H   | 4.69725300  | 0.27431700  | -2.34357200 |
| Cl  | 2.23330600  | 0.01624300  | -2.69091600 |

**Al<sub>8</sub>O<sub>12</sub>---C<sub>2</sub>H<sub>5</sub>Cl product-1 geometry:**  
**v1=20.73 cm<sup>-1</sup>**

|     |             |             |             |
|-----|-------------|-------------|-------------|
| 0 1 |             |             |             |
| O   | 0.72323900  | -1.35364400 | 0.36323700  |
| O   | -1.74349200 | -2.84224700 | 1.00184300  |
| Al  | 0.34679000  | 0.03614800  | 1.42034500  |
| Al  | 1.35810500  | -1.37286600 | -1.31313800 |
| O   | -1.84367800 | 1.41220000  | -1.13757300 |
| O   | 0.58970000  | 2.87408300  | -1.67477100 |
| Al  | -2.54538200 | 1.27716000  | 0.66854600  |

|    |             |             |             |
|----|-------------|-------------|-------------|
| O  | -1.81979100 | -1.49174400 | -1.07367600 |
| O  | -3.73709700 | -0.01705500 | 0.61046700  |
| Al | 1.33533700  | 1.33749500  | -1.37242900 |
| O  | 0.63949800  | -2.93427800 | -1.54490400 |
| O  | 0.42048800  | -0.04498600 | -2.20565600 |
| Al | -1.26850900 | -0.04967600 | -1.77110700 |
| Al | -0.54825300 | -2.62404500 | -0.24990800 |
| O  | -1.79250800 | 2.85673800  | 0.87418900  |
| O  | -1.40753600 | 0.02126100  | 1.42132500  |
| Al | -0.59246200 | 2.60283600  | -0.36620000 |
| Al | -2.52349500 | -1.28675800 | 0.72596900  |
| O  | 0.70207300  | 1.38489300  | 0.30425900  |
| O  | 2.65481300  | -0.00675300 | -1.34211700 |
| C  | 5.34787700  | -0.51251600 | 0.35515100  |
| H  | 5.06381900  | -1.49587000 | 0.71750200  |
| H  | 6.05600200  | -0.48119300 | -0.46715100 |
| H  | 3.44252800  | 0.01168300  | -0.76300400 |
| C  | 4.88982400  | 0.59609700  | 0.93091600  |
| H  | 5.20847000  | 1.57935200  | 0.59762900  |
| H  | 4.20861100  | 0.56204700  | 1.77578500  |
| Cl | 1.48241100  | 0.08770100  | 3.23546200  |

**Al<sub>8</sub>O<sub>12</sub>---C<sub>2</sub>H<sub>5</sub>Br reactant geometry:**  
**v1=27.54 cm<sup>-1</sup>**

|     |             |             |             |
|-----|-------------|-------------|-------------|
| 0 1 |             |             |             |
| O   | -0.29572700 | 0.75251400  | 1.40907600  |
| O   | 1.63237400  | -0.77558700 | 2.96246100  |
| Al  | -0.69814100 | -0.55430600 | 0.35221800  |
| Al  | 0.07514000  | 2.48069200  | 0.79561100  |
| O   | 2.10224600  | -0.33245000 | -1.72010300 |
| O   | 0.12847400  | 1.19740000  | -3.23600400 |
| Al  | 1.68761700  | -2.07110900 | -1.05047100 |
| O   | 2.61844600  | 0.36921800  | 1.01578500  |
| O   | 2.91751100  | -2.41407100 | 0.16351300  |
| Al  | -0.37292000 | 1.85004700  | -1.67905700 |
| O   | 1.13277000  | 2.59266000  | 2.19836300  |
| O   | 1.20890100  | 2.19281900  | -0.70166900 |
| Al  | 2.32187300  | 0.90491800  | -0.57141900 |
| Al  | 1.33811600  | 0.84441500  | 2.33853700  |
| O   | 0.62902600  | -2.16524900 | -2.45783800 |
| O   | 0.57121300  | -1.72078200 | 0.42080700  |
| Al  | 0.42785300  | -0.42272700 | -2.60212300 |
| Al  | 2.14780800  | -1.43731600 | 1.41303100  |
| O   | -0.81365900 | 0.06574200  | -1.26427700 |
| O   | -1.16483800 | 2.81282700  | -0.42506500 |

|    |             |             |             |
|----|-------------|-------------|-------------|
| C  | -4.19912500 | 1.15063000  | 0.03734200  |
| H  | -4.70209200 | 1.19420600  | 1.00371200  |
| H  | -4.83024100 | 1.67830100  | -0.68868800 |
| H  | -3.24673100 | 1.68513600  | 0.08126300  |
| C  | -4.05734700 | -0.24859500 | -0.46594500 |
| H  | -3.46231700 | -0.34602700 | -1.36896700 |
| H  | -4.98211500 | -0.81440900 | -0.52808100 |
| Br | -2.98934500 | -1.43256400 | 0.86285000  |

**Al<sub>8</sub>O<sub>12</sub>---C<sub>2</sub>H<sub>5</sub>Br TS1 geometry:**

**v1=-336.30 cm<sup>-1</sup>**

0 1

|    |             |             |             |
|----|-------------|-------------|-------------|
| O  | 0.49872900  | 1.37658700  | 0.41861100  |
| O  | -1.56128900 | 2.99164000  | -0.85232100 |
| Al | 0.62225100  | 0.18665600  | -0.85688200 |
| Al | 0.46400400  | 0.99706400  | 2.20927800  |
| O  | -2.28438800 | -1.57258100 | 0.20667300  |
| O  | -0.17248900 | -3.14684700 | 1.45128600  |
| Al | -2.18377900 | -1.10231600 | -1.65752600 |
| O  | -2.41332600 | 1.25967400  | 0.68962600  |
| O  | -3.35890900 | 0.19081700  | -1.87292300 |
| Al | 0.56712600  | -1.59002900 | 1.77201800  |
| O  | -0.40957900 | 2.50429500  | 2.40865400  |
| O  | -0.76811500 | -0.41605800 | 2.37447600  |
| Al | -2.11700900 | -0.29270000 | 1.31138700  |
| Al | -0.97761300 | 2.49543000  | 0.72713900  |
| O  | -1.32042100 | -2.63112900 | -1.80592000 |
| O  | -0.90057600 | 0.26416000  | -1.69311400 |
| Al | -0.75614900 | -2.63268400 | -0.14375400 |
| Al | -2.29279800 | 1.43376800  | -1.22539500 |
| O  | 0.63187900  | -1.36714000 | -0.04847100 |
| O  | 1.69574100  | -0.31597000 | 2.37665900  |
| C  | 4.16608100  | -0.11325500 | 1.24363800  |
| H  | 4.54635300  | 0.78778400  | 1.72140000  |
| H  | 4.47090200  | -1.03230200 | 1.75955200  |
| H  | 3.01952000  | -0.18220300 | 1.59565900  |
| C  | 4.48095600  | -0.21550500 | -0.13358500 |
| H  | 4.49035800  | -1.18465700 | -0.61713000 |
| H  | 5.04648500  | 0.55974800  | -0.63273300 |
| Br | 2.74879100  | 0.47106200  | -1.92812600 |

**Al<sub>8</sub>O<sub>12</sub>---C<sub>2</sub>H<sub>5</sub>Br product-1 geometry:**  
**v1=18.63 cm<sup>-1</sup>**

|     |             |             |             |
|-----|-------------|-------------|-------------|
| 0 1 |             |             |             |
| O   | -0.59684900 | 0.07902200  | 1.36966300  |
| O   | 1.64669300  | -1.13906600 | 2.84947400  |
| Al  | -0.52670200 | -1.06691000 | -0.00035100 |
| Al  | -0.78251200 | 1.86243500  | 1.35662100  |
| O   | 2.23023600  | 0.82242200  | -1.45156900 |
| O   | -0.00693500 | 1.93736800  | -2.90236800 |
| Al  | 2.44581800  | -1.10112800 | -1.28358900 |
| O   | 2.23137200  | 0.82065600  | 1.45120500  |
| O   | 3.63087500  | -1.32626500 | -0.00212100 |
| Al  | -0.78361800 | 1.86433200  | -1.35348300 |
| O   | -0.00463900 | 1.93369000  | 2.90502000  |
| O   | 0.33241000  | 2.46438400  | 0.00155700  |
| Al  | 1.85485400  | 1.61113700  | 0.00045600  |
| Al  | 0.80884900  | 0.37276400  | 2.61389200  |
| O   | 1.64426200  | -1.13549000 | -2.85182200 |
| O   | 1.17031700  | -1.51416800 | -0.00118300 |
| Al  | 0.80678400  | 0.37610400  | -2.61378600 |
| Al  | 2.44695500  | -1.10285200 | 1.28067400  |
| O   | -0.59793000 | 0.08092400  | -1.36865500 |
| O   | -2.05048300 | 2.19179500  | 0.00233900  |
| C   | -4.88054900 | 0.77167400  | -0.66477100 |
| H   | -5.34073600 | 1.57240200  | -1.23579500 |
| H   | -4.45458800 | -0.05452000 | -1.22567600 |
| H   | -2.94916300 | 1.80608600  | 0.00230600  |
| C   | -4.88082500 | 0.77181000  | 0.66564400  |
| H   | -4.45526200 | -0.05433500 | 1.22692300  |
| H   | -5.34136300 | 1.57259200  | 1.23631100  |
| Br  | -2.21259500 | -2.64090800 | -0.00077900 |

**Al<sub>8</sub>O<sub>12</sub>---C<sub>2</sub>H<sub>5</sub>I reactant geometry:**  
**v1=26.73 cm<sup>-1</sup>**

|     |             |             |             |
|-----|-------------|-------------|-------------|
| 0 1 |             |             |             |
| O   | -0.42753900 | 0.77473400  | 1.14331900  |
| O   | 0.73811700  | -1.01930900 | 3.11906400  |
| Al  | -0.54748400 | -0.44228200 | -0.08764300 |
| Al  | 0.30621300  | 2.47448900  | 0.80943700  |
| O   | 2.81083200  | -0.43400200 | -1.09773400 |
| O   | 1.59808100  | 1.36554100  | -3.05609600 |
| Al  | 2.03841200  | -2.14063200 | -0.73551800 |
| O   | 2.41115900  | 0.09295700  | 1.69138900  |

|    |             |             |             |
|----|-------------|-------------|-------------|
| O  | 2.74543800  | -2.66835000 | 0.79049300  |
| Al | 0.64775200  | 1.99676300  | -1.71458300 |
| O  | 0.81979700  | 2.41062700  | 2.49298400  |
| O  | 1.84206400  | 2.13550700  | -0.23970500 |
| Al | 2.72776300  | 0.72737800  | 0.14299800  |
| Al | 0.81766900  | 0.64636200  | 2.55573100  |
| O  | 1.51343000  | -2.06401200 | -2.41551400 |
| O  | 0.51741200  | -1.74422600 | 0.30278700  |
| Al | 1.52127800  | -0.30444800 | -2.48816600 |
| Al | 1.68231800  | -1.66892700 | 1.77854700  |
| O  | -0.02963900 | 0.25716500  | -1.58293600 |
| O  | -0.42465500 | 2.99012400  | -0.71529900 |
| C  | -3.77667800 | 1.95324700  | -0.37297000 |
| H  | -2.75072300 | 2.19131800  | -0.66395800 |
| H  | -4.19137400 | 2.85092000  | 0.10215500  |
| H  | -4.37529800 | 1.74521500  | -1.26036400 |
| C  | -3.85561200 | 0.85272100  | 0.64130900  |
| I  | -3.15596200 | -1.10820600 | -0.17159800 |
| H  | -4.86302700 | 0.59901000  | 0.95965600  |
| H  | -3.19676400 | 0.98546300  | 1.49471800  |

**Al<sub>8</sub>O<sub>12</sub>---C<sub>2</sub>H<sub>5</sub>I TS1 geometry:**

**v1=-362.58 cm<sup>-1</sup>**

0 1

|    |             |             |             |
|----|-------------|-------------|-------------|
| O  | -0.26769900 | 0.34871300  | 1.40346600  |
| O  | 1.44753700  | -1.53112200 | 2.82129500  |
| Al | -0.52366600 | -0.65880900 | -0.00500200 |
| Al | 0.10148300  | 2.14214800  | 1.35564700  |
| O  | 2.63348700  | 0.16429900  | -1.44877400 |
| O  | 0.86081100  | 2.01757200  | -2.83608000 |
| Al | 2.18904800  | -1.70437600 | -1.32835000 |
| O  | 2.65279300  | 0.11440300  | 1.42826400  |
| O  | 3.22567400  | -2.34662600 | -0.05859000 |
| Al | 0.08684900  | 2.18786700  | -1.27228100 |
| O  | 0.89682000  | 1.91669900  | 2.90167100  |
| O  | 1.42761000  | 2.33013800  | 0.03578900  |
| Al | 2.56778700  | 1.03928300  | 0.00595000  |
| Al | 1.16968200  | 0.18833900  | 2.60349300  |
| O  | 1.41101500  | -1.43080200 | -2.88509200 |
| O  | 0.83345300  | -1.74973400 | -0.03247400 |
| Al | 1.13589900  | 0.27967500  | -2.60261200 |
| Al | 2.20587200  | -1.74884800 | 1.24622000  |
| O  | -0.28794800 | 0.39712000  | -1.38194700 |
| O  | -0.99735100 | 2.75718300  | 0.05781700  |



|   |             |             |             |
|---|-------------|-------------|-------------|
| C | -3.65255800 | 2.25554400  | 0.06553100  |
| H | -2.44473300 | 2.30515100  | 0.05112500  |
| H | -3.86166100 | 2.74714600  | 1.01639500  |
| H | -3.81964800 | 2.90226000  | -0.80064200 |
| C | -4.32792600 | 1.01747700  | -0.07761200 |
| I | -3.00568100 | -1.41872200 | 0.00038900  |
| H | -4.64726800 | 0.68315300  | -1.05617700 |
| H | -4.86071400 | 0.58506900  | 0.75857500  |

**Al<sub>8</sub>O<sub>12</sub>---C<sub>2</sub>H<sub>5</sub>I product-1 geometry:**  
**v1=20.90 cm<sup>-1</sup>**

|     |             |             |             |
|-----|-------------|-------------|-------------|
| 0 1 |             |             |             |
| O   | 0.33284600  | 0.37291400  | -1.36916100 |
| O   | -1.51313900 | -1.39174500 | -2.85058800 |
| Al  | 0.56853900  | -0.75296300 | -0.00000300 |
| Al  | 0.03973200  | 2.14223000  | -1.35520000 |
| O   | -2.59450500 | 0.34531400  | 1.45250600  |
| O   | -0.72721800 | 2.00717100  | 2.90416700  |
| Al  | -2.29463500 | -1.56771500 | 1.28235700  |
| O   | -2.59461300 | 0.34502000  | -1.45235400 |
| O   | -3.37801800 | -2.09590300 | 0.00034700  |
| Al  | 0.03989200  | 2.14251000  | 1.35471700  |
| O   | -0.72756100 | 2.00660000  | -2.90453900 |
| O   | -1.19575000 | 2.42621200  | -0.00019200 |
| Al  | -2.44114700 | 1.20411400  | -0.00001800 |
| Al  | -1.10221700 | 0.28675500  | -2.61380400 |
| O   | -1.51283500 | -1.39116700 | 2.85094100  |
| O   | -0.95472200 | -1.62764100 | 0.00019000  |
| Al  | -1.10192100 | 0.28727900  | 2.61377400  |
| Al  | -2.29472300 | -1.56800100 | -1.28186500 |
| O   | 0.33299300  | 0.37318200  | 1.36898900  |
| O   | 1.17079700  | 2.79932000  | -0.00040600 |
| C   | 4.31152300  | 2.38682200  | -0.66518400 |
| H   | 2.14358900  | 2.70213700  | -0.00030900 |
| H   | 4.19397500  | 1.46588600  | -1.22801000 |
| H   | 4.46991800  | 3.29720200  | -1.23533100 |
| C   | 4.31110700  | 2.38663400  | 0.66516900  |
| I   | 2.77948000  | -1.93372200 | 0.00003300  |
| H   | 4.46909700  | 3.29684700  | 1.23569700  |
| H   | 4.19323300  | 1.46553200  | 1.22765800  |

**Al<sub>8</sub>O<sub>12</sub>---C<sub>2</sub>H<sub>5</sub>F TS2 geometry:**  
**v1=-220.16 cm<sup>-1</sup>**

|     |             |             |             |
|-----|-------------|-------------|-------------|
| 0 1 |             |             |             |
| O   | -0.82689300 | -1.37887600 | 0.39586500  |
| O   | -2.74620700 | 0.00021300  | -1.20314700 |
| Al  | -0.46749400 | -0.00001100 | 1.43992100  |
| Al  | 0.43488200  | -2.59848400 | -0.26139100 |
| O   | 1.74071700  | 1.43855200  | -0.98798600 |
| O   | 3.58258300  | -0.00021800 | 0.77377500  |
| Al  | 0.43519600  | 2.59848300  | -0.26124600 |
| O   | -0.46262300 | 0.00011100  | -2.18684400 |
| O   | -0.73915400 | 2.86429000  | -1.56591300 |
| Al  | 2.38157100  | -1.28777100 | 0.82082300  |
| O   | -0.73947600 | -2.86406600 | -1.56609400 |
| O   | 1.74053000  | -1.43865900 | -0.98805500 |
| Al  | 1.18992000  | -0.00000100 | -1.70295200 |
| Al  | -1.49923800 | -1.30192700 | -1.32333200 |
| O   | 1.59671500  | 2.85116200  | 1.03155800  |
| O   | -0.82668900 | 1.37894500  | 0.39592600  |
| Al  | 2.38172400  | 1.28747500  | 0.82089300  |
| Al  | -1.49909500 | 1.30222500  | -1.32323700 |
| O   | 1.26130700  | -0.00011000 | 1.59945900  |
| O   | 1.59636900  | -2.85137400 | 1.03139800  |
| C   | -4.71364200 | 0.00007000  | 1.75803500  |
| H   | -4.96583700 | -0.90732000 | 2.30574100  |
| H   | -5.33097400 | 0.00085800  | 0.83902600  |
| H   | -4.96502300 | 0.90723700  | 2.30653200  |
| C   | -3.36689200 | -0.00015600 | 1.23345700  |
| H   | -2.87450600 | 0.92519400  | 0.98894600  |
| H   | -2.87458100 | -0.92562600 | 0.98910000  |
| F   | -1.73003600 | 0.00006200  | 2.67321600  |

**Al<sub>8</sub>O<sub>12</sub>---C<sub>2</sub>H<sub>5</sub>F product-2 geometry:**  
**v1=38.25 cm<sup>-1</sup>**

|     |             |             |             |
|-----|-------------|-------------|-------------|
| 0 1 |             |             |             |
| O   | 0.93462900  | 1.17639100  | 0.68772400  |
| O   | 2.89455100  | -0.67944300 | -0.39540800 |
| Al  | 0.05098700  | -0.00526000 | 1.69840100  |
| Al  | 0.11366500  | 2.57342900  | -0.30099900 |
| O   | -1.72080400 | -1.23902200 | -1.23739800 |
| O   | -3.64386300 | 0.68692600  | -0.10176200 |
| Al  | -0.94224700 | -2.54057100 | -0.10436600 |
| O   | 0.97748300  | -0.33108000 | -1.79388800 |

|    |             |             |             |
|----|-------------|-------------|-------------|
| O  | 0.42981300  | -3.16040600 | -1.06334600 |
| Al | -2.26089800 | 1.72496600  | 0.23014400  |
| O  | 1.60509900  | 2.52734600  | -1.28036000 |
| O  | -1.13300000 | 1.60672700  | -1.34667800 |
| Al | -0.73145600 | 0.02132900  | -1.78754900 |
| Al | 1.92759000  | 0.89794000  | -0.77847500 |
| O  | -2.42320900 | -2.44108500 | 0.81269300  |
| O  | 0.37873000  | -1.50755000 | 0.78566300  |
| Al | -2.77761200 | -0.78440300 | 0.32802000  |
| Al | 1.37519900  | -1.75744100 | -0.68178100 |
| O  | -1.61298000 | 0.32163000  | 1.24960200  |
| O  | -1.27257200 | 3.13736000  | 0.59639700  |
| C  | 4.65574900  | 0.49651300  | 0.78127500  |
| H  | 5.16233400  | 0.75551800  | -0.15176100 |
| H  | 5.41504500  | 0.40980600  | 1.56111900  |
| H  | 3.99305500  | 1.31702100  | 1.07910600  |
| C  | 3.89311700  | -0.79860700 | 0.65054400  |
| H  | 3.38807800  | -1.05086900 | 1.58676800  |
| H  | 4.55600800  | -1.62076700 | 0.37401500  |
| F  | 0.56259200  | -0.05226300 | 3.31219700  |

**Al<sub>8</sub>O<sub>12</sub>-C<sub>2</sub>H<sub>5</sub>Cl TS2 geometry:**

**v1=-220.07 cm<sup>-1</sup>**

0 1

|    |             |             |             |
|----|-------------|-------------|-------------|
| O  | -0.78076600 | -1.37689400 | 0.22423700  |
| O  | -2.51791200 | -0.00071200 | -1.58666600 |
| Al | -0.50064400 | -0.00007400 | 1.28651900  |
| Al | 0.55215700  | -2.59570100 | -0.30533000 |
| O  | 1.92534100  | 1.43910000  | -0.90570700 |
| O  | 3.59143800  | 0.00079200  | 1.02357000  |
| Al | 0.55103900  | 2.59575400  | -0.30577000 |
| O  | -0.14437500 | -0.00029300 | -2.31269300 |
| O  | -0.48543400 | 2.86141000  | -1.72032300 |
| Al | 2.39292400  | -1.28780400 | 0.95461600  |
| O  | -0.48422200 | -2.86201900 | -1.71983500 |
| O  | 1.92596800  | -1.43854500 | -0.90545000 |
| Al | 1.45594200  | 0.00010900  | -1.67717500 |
| Al | -1.26587800 | -1.30185000 | -1.56180500 |
| O  | 1.58193200  | 2.84729300  | 1.09203200  |
| O  | -0.78140600 | 1.37645000  | 0.22399100  |
| Al | 2.39237100  | 1.28886400  | 0.95439500  |
| Al | -1.26638500 | 1.30091400  | -1.56207600 |
| O  | 1.20043500  | 0.00033700  | 1.61576600  |
| O  | 1.58316300  | -2.84655900 | 1.09252100  |

|    |             |             |             |
|----|-------------|-------------|-------------|
| C  | -4.92586900 | 0.00022200  | 0.80968000  |
| H  | -5.30511800 | -0.90258500 | 1.28714500  |
| H  | -5.30172800 | 0.00062100  | -0.22802200 |
| H  | -5.30422600 | 0.90325700  | 1.28749600  |
| C  | -3.47939800 | -0.00044300 | 0.65547200  |
| H  | -2.94207200 | 0.92324300  | 0.53625300  |
| H  | -2.94286600 | -0.92467900 | 0.53663100  |
| Cl | -2.16091300 | -0.00024600 | 2.80200900  |

**Al<sub>8</sub>O<sub>12</sub>---C<sub>2</sub>H<sub>5</sub>Cl product-2 geometry:**  
**v1=41.56 cm<sup>-1</sup>**

|     |             |             |             |
|-----|-------------|-------------|-------------|
| 0 1 |             |             |             |
| O   | -0.39170000 | 1.51254300  | 0.59572500  |
| O   | 2.40149600  | 2.45627000  | 0.77518200  |
| Al  | -0.11632700 | 0.02624400  | 1.54993300  |
| Al  | -1.30004700 | 1.73801300  | -0.93274200 |
| O   | 1.25253200  | -1.62642000 | -1.39732400 |
| O   | -1.48359700 | -2.55517300 | -1.47859700 |
| Al  | 2.28335000  | -1.71917400 | 0.24706100  |
| O   | 1.82497800  | 1.22013400  | -1.29328100 |
| O   | 3.68035300  | -0.68121600 | -0.01599300 |
| Al  | -1.83998800 | -0.91990600 | -1.02079800 |
| O   | -0.33604700 | 3.13756600  | -1.27751200 |
| O   | -0.83302100 | 0.29639300  | -1.99671800 |
| Al  | 0.87384800  | -0.04984400 | -1.88770200 |
| Al  | 0.97866900  | 2.53783800  | -0.23062400 |
| O   | 1.27936200  | -3.12997400 | 0.57168400  |
| O   | 1.57273400  | -0.30320000 | 1.20970600  |
| Al  | -0.05117700 | -2.58395900 | -0.41559800 |
| Al  | 2.78763000  | 0.79352500  | 0.33908200  |
| O   | -0.93124100 | -1.17315100 | 0.50456800  |
| O   | -2.82930500 | 0.65944300  | -0.71758300 |
| C   | -4.63247700 | -0.51080600 | 0.40329500  |
| H   | -5.07974300 | -0.81870600 | -0.54524100 |
| H   | -5.43727300 | -0.40969800 | 1.13427200  |
| H   | -3.97168600 | -1.30280300 | 0.77322300  |
| C   | -3.89127700 | 0.79558600  | 0.26319800  |
| H   | -3.44818100 | 1.09607700  | 1.21639200  |
| H   | -4.55361900 | 1.59025900  | -0.08549500 |
| Cl  | -0.88392900 | 0.11381700  | 3.54335800  |

**Al<sub>8</sub>O<sub>12</sub>---C<sub>2</sub>H<sub>5</sub>Br TS2 geometry:**  
**v1=-228.74 cm<sup>-1</sup>**

|     |             |             |             |
|-----|-------------|-------------|-------------|
| 0 1 |             |             |             |
| O   | 0.59940500  | 1.37674700  | 0.04479600  |
| O   | -1.45604000 | 2.75457100  | -1.50011000 |
| Al  | 0.59511200  | -0.07241500 | -0.95804200 |
| Al  | 0.60912800  | 1.43238300  | 1.89669700  |
| O   | -2.32070100 | -1.38743600 | 0.64017500  |
| O   | -0.20537700 | -2.72165100 | 2.13821300  |
| Al  | -2.29785300 | -1.37138400 | -1.28335700 |
| O   | -2.30453400 | 1.48279400  | 0.43789800  |
| O   | -3.43151400 | -0.10563700 | -1.74599000 |
| Al  | 0.59728300  | -1.16574900 | 2.07796000  |
| O   | -0.17672400 | 2.98968300  | 1.73903800  |
| O   | -0.67243000 | 0.17023300  | 2.42562300  |
| Al  | -2.05533300 | 0.10696400  | 1.40167400  |
| Al  | -0.81770300 | 2.61314500  | 0.12850300  |
| O   | -1.48733700 | -2.92506100 | -1.10161800 |
| O   | -0.96897600 | -0.11700800 | -1.70588000 |
| Al  | -0.84509500 | -2.56498300 | 0.49132100  |
| Al  | -2.28276300 | 1.19901900  | -1.46488800 |
| O   | 0.58492300  | -1.36620400 | 0.23758300  |
| O   | 1.80660200  | 0.15221000  | 2.33599000  |
| C   | 4.74188400  | 0.07419600  | 0.82592000  |
| H   | 5.23937500  | 0.95606500  | 0.42315900  |
| H   | 5.27128200  | -0.84023000 | 0.56003900  |
| H   | 4.76811800  | 0.15863000  | 1.92453100  |
| C   | 3.32079300  | 0.02671400  | 0.49777800  |
| H   | 2.79138300  | -0.90849200 | 0.49333500  |
| H   | 2.76577300  | 0.93566600  | 0.35703000  |
| Br  | 2.72895900  | -0.16096500 | -2.08669400 |

**Al<sub>8</sub>O<sub>12</sub>---C<sub>2</sub>H<sub>5</sub>Br product-2 geometry:**  
**v1=40.33 cm<sup>-1</sup>**

|     |             |             |             |
|-----|-------------|-------------|-------------|
| 0 1 |             |             |             |
| O   | -0.88060900 | -0.09815600 | -1.18302400 |
| O   | 1.27257200  | 0.27899300  | -3.17286700 |
| Al  | -0.34008400 | 1.22957500  | -0.11349000 |
| Al  | -1.40830700 | -1.76106400 | -0.76268900 |
| O   | 2.19952300  | -0.94782900 | 1.33730600  |
| O   | 0.07719200  | -1.23590200 | 3.27519600  |
| Al  | 2.75993100  | 0.81110000  | 0.72966500  |
| O   | 1.68902600  | -1.47428300 | -1.47289200 |

|    |             |             |             |
|----|-------------|-------------|-------------|
| O  | 3.72322700  | 0.52092000  | -0.71463700 |
| Al | -0.92768600 | -1.27201100 | 1.86235800  |
| O  | -0.94129100 | -2.28688900 | -2.34863300 |
| O  | -0.21260600 | -2.34607900 | 0.53184300  |
| Al | 1.42365400  | -1.87521400 | 0.15109200  |
| Al | 0.20295900  | -0.92769100 | -2.50725800 |
| O  | 2.26818300  | 1.31501700  | 2.34448900  |
| O  | 1.38618800  | 1.25934300  | -0.43299400 |
| Al | 1.11809900  | 0.01986600  | 2.55159700  |
| Al | 2.31256500  | 0.34397300  | -1.75224200 |
| O  | -0.39771200 | 0.39516400  | 1.46803800  |
| O  | -2.45440600 | -1.53478600 | 0.79206300  |
| C  | -4.47204900 | -1.04308000 | -0.45490800 |
| H  | -3.91993300 | -0.63797700 | -1.31070400 |
| H  | -5.42930300 | -0.51868300 | -0.42625700 |
| H  | -4.67626900 | -2.10398700 | -0.61968100 |
| C  | -3.71894600 | -0.82270200 | 0.83354000  |
| H  | -4.27888300 | -1.20609200 | 1.68864800  |
| H  | -3.51484400 | 0.23992100  | 0.99008400  |
| Br | -1.64868000 | 3.12189900  | -0.23007000 |

**Al<sub>8</sub>O<sub>12</sub>---C<sub>2</sub>H<sub>5</sub>I TS2 geometry:**

**v1=-248.11 cm<sup>-1</sup>**

0 1

|    |             |             |             |
|----|-------------|-------------|-------------|
| O  | 0.30860900  | 0.36791400  | 1.37335400  |
| O  | 1.02099700  | 2.78215500  | -0.00134500 |
| Al | 0.54535000  | -0.71122000 | 0.00006500  |
| Al | -1.11936100 | 0.22911400  | 2.59409800  |
| O  | -2.61911900 | 0.13830600  | -1.43898200 |
| O  | -3.22631900 | -2.33590700 | 0.00141900  |
| Al | -1.12055000 | 0.22714000  | -2.59412200 |
| O  | -1.41706800 | 2.33363600  | -0.00073600 |
| O  | -0.84342100 | 1.95824300  | -2.86365400 |
| Al | -2.18969100 | -1.72937100 | 1.28932000  |
| O  | -0.84227500 | 1.96043000  | 2.86225800  |
| O  | -2.61843000 | 0.13939600  | 1.43964300  |
| Al | -2.55190700 | 1.03786000  | -0.00002700 |
| Al | -0.07729700 | 2.17783300  | 1.30196900  |
| O  | -1.40360700 | -1.48633300 | -2.84506900 |
| O  | 0.30778200  | 0.36672400  | -1.37402200 |
| Al | -2.19021200 | -1.73036200 | -1.28735200 |
| Al | -0.07779100 | 2.17676600  | -1.30382300 |
| O  | -0.82870600 | -1.77256900 | 0.00075700  |
| O  | -1.40237700 | -1.48414400 | 2.84650800  |

|   |            |             |             |
|---|------------|-------------|-------------|
| C | 4.15838400 | 2.12174900  | -0.00012800 |
| H | 4.74860200 | 1.94582100  | 0.89873900  |
| H | 3.87180000 | 3.18467100  | -0.00044000 |
| H | 4.74890700 | 1.94553300  | -0.89868400 |
| C | 2.89170600 | 1.38828500  | -0.00032400 |
| I | 3.06043500 | -1.43387600 | 0.00002400  |
| H | 2.39912100 | 1.15259700  | -0.92521700 |
| H | 2.39840600 | 1.15293600  | 0.92431100  |

**Al<sub>8</sub>O<sub>12</sub>---C<sub>2</sub>H<sub>5</sub>I product-2 geometry:**  
**v1=38.82 cm<sup>-1</sup>**

|     |             |             |             |
|-----|-------------|-------------|-------------|
| 0 1 |             |             |             |
| O   | 0.49020400  | 0.62116700  | 1.17658200  |
| O   | 1.03686900  | 2.76050400  | -0.71579400 |
| Al  | 0.69509900  | -0.74484400 | 0.03932800  |
| Al  | -0.81886800 | 0.70692900  | 2.55241600  |
| O   | -2.64849500 | -0.13696600 | -1.27726600 |
| O   | -3.12684400 | -2.27621000 | 0.69066000  |
| Al  | -1.26323100 | -0.34461100 | -2.54881700 |
| O   | -1.28963200 | 2.27062000  | -0.40426200 |
| O   | -1.04763300 | 1.30091400  | -3.20360200 |
| Al  | -1.97943000 | -1.44144500 | 1.73205400  |
| O   | -0.54672400 | 2.46787300  | 2.46698700  |
| O   | -2.40449600 | 0.44859500  | 1.55624300  |
| Al  | -2.43415500 | 1.00381300  | -0.04378300 |
| Al  | 0.07404200  | 2.33561300  | 0.85201700  |
| O   | -1.56994200 | -2.05642000 | -2.41270300 |
| O   | 0.26261700  | 0.06938000  | -1.49477200 |
| Al  | -2.19894400 | -1.95763400 | -0.77033800 |
| Al  | -0.16215100 | 1.78712600  | -1.79399500 |
| O   | -0.75400100 | -1.68487200 | 0.36049900  |
| O   | -1.08194700 | -0.91008900 | 3.15156900  |
| C   | 3.05695000  | 3.36262200  | 0.47877200  |
| H   | 2.68036500  | 4.36434200  | 0.69981100  |
| H   | 4.14513600  | 3.42105100  | 0.41068600  |
| H   | 2.83188600  | 2.69255800  | 1.31633700  |
| C   | 2.48362400  | 2.83211600  | -0.81153900 |
| I   | 2.98282900  | -1.76319700 | 0.05373200  |
| H   | 2.86861100  | 1.83192100  | -1.02723100 |
| H   | 2.72010200  | 3.49084800  | -1.64938500 |

**Al<sub>6</sub>O<sub>9</sub>---C<sub>2</sub>H<sub>5</sub>F reactant geometry:**  
**v1=21.44 cm<sup>-1</sup>**

|     |             |             |             |
|-----|-------------|-------------|-------------|
| 0 1 |             |             |             |
| O   | -1.59991200 | -2.60104800 | -0.84055000 |
| O   | 0.12925200  | -1.69420800 | 1.42009800  |
| O   | -1.81123400 | 2.43979500  | -0.27707700 |
| O   | 0.87905600  | 1.45483500  | -1.95292000 |
| O   | -1.06568900 | -0.09892000 | -0.44263000 |
| O   | 0.92271700  | 1.00162600  | 0.57420400  |
| Al  | -2.49710700 | -1.17315900 | -0.60837400 |
| Al  | -2.54467500 | 1.14283300  | 0.62971000  |
| Al  | -0.02464400 | -1.96638000 | -0.30394700 |
| Al  | -0.34021100 | 1.67491600  | -0.74710500 |
| O   | -1.67063800 | 0.76105300  | 2.08548600  |
| O   | 1.40765900  | -1.46204800 | -1.13697000 |
| Al  | 1.64661600  | 0.23344100  | -0.97920900 |
| O   | -3.66146700 | -0.07626700 | -0.01801000 |
| Al  | -0.25351600 | -0.02080100 | 1.48765100  |
| C   | 4.29715100  | -0.71414600 | 1.26158100  |
| H   | 3.32060200  | -1.16547500 | 1.44258700  |
| H   | 4.80529000  | -0.60640300 | 2.22522800  |
| H   | 4.89365100  | -1.37553600 | 0.63332100  |
| C   | 4.17648800  | 0.64675300  | 0.66824800  |
| H   | 5.11724700  | 1.11382000  | 0.39132300  |
| H   | 3.52448600  | 1.32596200  | 1.21253100  |
| F   | 3.49276800  | 0.52582000  | -0.66671700 |

**Al<sub>6</sub>O<sub>9</sub>---C<sub>2</sub>H<sub>5</sub>F TS1 geometry:**  
**v1=-397.38 cm<sup>-1</sup>**

|     |             |             |             |
|-----|-------------|-------------|-------------|
| 0 1 |             |             |             |
| O   | 0.98602100  | 2.50706500  | -1.35191000 |
| O   | -0.70248800 | 1.59655500  | 1.02344300  |
| O   | 2.24818000  | -2.13695200 | 0.14300800  |
| O   | -0.61265500 | -2.17017900 | -1.54484300 |
| O   | 0.99237000  | 0.11724600  | -0.46605700 |
| O   | -0.66876300 | -1.24841000 | 0.83133600  |
| Al  | 2.19650700  | 1.39684900  | -0.90038400 |
| Al  | 2.69674200  | -0.57277100 | 0.74975900  |
| Al  | -0.38015900 | 1.52534000  | -0.75932700 |
| Al  | 0.62752400  | -1.86722000 | -0.39281500 |
| O   | 1.77014700  | -0.04075800 | 2.13110000  |
| O   | -1.67838400 | 0.61464900  | -1.40020200 |
| Al  | -1.70012100 | -1.02579700 | -0.77583600 |



|    |             |             |             |
|----|-------------|-------------|-------------|
| O  | 3.55403300  | 0.68719600  | -0.16312700 |
| Al | 0.19990400  | 0.15845600  | 1.45623300  |
| C  | -3.41473900 | 1.33102800  | 1.35514100  |
| H  | -2.22218600 | 1.32378100  | 1.14128300  |
| H  | -3.54206100 | 1.18159900  | 2.42478100  |
| H  | -3.50085600 | 2.37945900  | 1.04346800  |
| C  | -4.20968600 | 0.51779500  | 0.52905400  |
| H  | -4.36002900 | 0.79145400  | -0.50731600 |
| H  | -4.88128200 | -0.22539000 | 0.93572800  |
| F  | -3.35332000 | -1.21647600 | -0.20825400 |

**Al<sub>6</sub>O<sub>9</sub>---C<sub>2</sub>H<sub>5</sub>Cl reactant geometry:**  
 **$\nu_1=15.23 \text{ cm}^{-1}$**

|     |             |             |             |
|-----|-------------|-------------|-------------|
| 0 1 |             |             |             |
| O   | 1.27968700  | 2.75560800  | -0.78299200 |
| O   | 0.40238500  | 1.48128600  | 1.77297200  |
| O   | 2.35314500  | -2.19777600 | -0.72418600 |
| O   | -0.81494500 | -1.59842800 | -1.52681600 |
| O   | 1.21989500  | 0.19443400  | -0.49279800 |
| O   | -0.21469100 | -1.26611200 | 0.93996000  |
| Al  | 2.40153200  | 1.48005800  | -0.91509100 |
| Al  | 3.11140900  | -0.84897400 | 0.07687900  |
| Al  | 0.03917100  | 1.82544900  | 0.09699900  |
| Al  | 0.71591500  | -1.66208600 | -0.72268500 |
| O   | 2.61752800  | -0.68322500 | 1.73493000  |
| O   | -1.50914800 | 1.15671300  | -0.34499100 |
| Al  | -1.44228400 | -0.57291400 | -0.26714200 |
| O   | 3.82477200  | 0.56076600  | -0.72945200 |
| Al  | 0.99086200  | -0.12378100 | 1.63319500  |
| C   | -5.54464900 | 0.78067100  | -0.68828200 |
| H   | -5.12242400 | 0.66913500  | -1.68680100 |
| H   | -5.98733900 | 1.78082600  | -0.62152100 |
| H   | -6.34152200 | 0.05065800  | -0.54461100 |
| C   | -4.49565100 | 0.69705900  | 0.37018300  |
| H   | -4.86687400 | 0.74027400  | 1.38913800  |
| H   | -3.62385900 | 1.33059800  | 0.21396700  |
| Cl  | -3.68829900 | -1.05498700 | 0.33278800  |

**Al<sub>6</sub>O<sub>9</sub>---C<sub>2</sub>H<sub>5</sub>Cl TS1 geometry:**  
**v1=-349.57 cm<sup>-1</sup>**

|     |             |             |             |
|-----|-------------|-------------|-------------|
| 0 1 |             |             |             |
| O   | 1.27130200  | 2.40441600  | -1.49172500 |
| O   | -0.41150300 | 1.71633000  | 0.94675400  |
| O   | 2.35114700  | -2.19414800 | 0.25040300  |
| O   | -0.50317400 | -2.19280600 | -1.44572800 |
| O   | 1.18145200  | 0.06974100  | -0.48048800 |
| O   | -0.53316000 | -1.15268200 | 0.88424900  |
| Al  | 2.43801200  | 1.27455600  | -0.97604400 |
| Al  | 2.86202300  | -0.62296200 | 0.78381100  |
| Al  | -0.12603500 | 1.51329700  | -0.83041700 |
| Al  | 0.74526600  | -1.88161500 | -0.30495700 |
| O   | 1.95336900  | 0.00819600  | 2.13334600  |
| O   | -1.48655400 | 0.63738900  | -1.39785800 |
| Al  | -1.55450200 | -0.98235500 | -0.73087300 |
| O   | 3.76389200  | 0.55538200  | -0.19217700 |
| Al  | 0.39112100  | 0.24463500  | 1.45253900  |
| C   | -3.12880300 | 1.95495800  | 1.26811900  |
| H   | -3.32192800 | 1.96747200  | 2.33782100  |
| H   | -2.99240200 | 2.95867000  | 0.84033000  |
| H   | -1.96745700 | 1.69510600  | 1.09601900  |
| C   | -4.05792300 | 1.24708600  | 0.48476600  |
| H   | -4.06145700 | 1.37436200  | -0.59116200 |
| H   | -4.92034800 | 0.76103800  | 0.92036500  |
| Cl  | -3.65510200 | -1.22798200 | -0.05280300 |

**Al<sub>6</sub>O<sub>9</sub>---C<sub>2</sub>H<sub>5</sub>Br reactant geometry:**  
**v1=20.58 cm<sup>-1</sup>**

|     |             |             |             |
|-----|-------------|-------------|-------------|
| 0 1 |             |             |             |
| O   | -2.26330600 | -2.34781400 | -1.30945400 |
| O   | -0.56134200 | -1.95351300 | 1.11372200  |
| O   | -2.20809900 | 2.51981600  | 0.12261000  |
| O   | 0.47373100  | 1.67797200  | -1.64257600 |
| O   | -1.60118900 | 0.00665100  | -0.46908700 |
| O   | 0.41246100  | 0.79288200  | 0.77006500  |
| Al  | -3.08741700 | -0.93124200 | -0.84854800 |
| Al  | -3.04414500 | 1.13536400  | 0.77442300  |
| Al  | -0.67435600 | -1.90738800 | -0.63577000 |
| Al  | -0.76833900 | 1.76116600  | -0.44345700 |
| O   | -2.23925700 | 0.45400900  | 2.15869600  |
| O   | 0.81760300  | -1.35869900 | -1.32722500 |
| Al  | 1.14879500  | 0.26832400  | -0.87276700 |

|    |             |             |             |
|----|-------------|-------------|-------------|
| O  | -4.20499200 | 0.11612800  | -0.09913400 |
| Al | -0.85026600 | -0.29629000 | 1.46431200  |
| C  | 3.30353900  | -1.63424400 | 1.61869600  |
| H  | 2.31390800  | -1.89127500 | 1.23848700  |
| H  | 3.32946600  | -1.90283300 | 2.68125900  |
| H  | 4.05581100  | -2.23182700 | 1.10364000  |
| C  | 3.58844300  | -0.16812600 | 1.52987700  |
| H  | 4.57826300  | 0.12494100  | 1.86693300  |
| H  | 2.81737200  | 0.46807900  | 1.95474400  |
| Br | 3.63236800  | 0.47424500  | -0.42782700 |

**Al<sub>6</sub>O<sub>9</sub>---C<sub>2</sub>H<sub>5</sub>Br TS1 geometry:**

**v1=-406.25 cm<sup>-1</sup>**

|     |             |             |             |
|-----|-------------|-------------|-------------|
| 0 1 |             |             |             |
| O   | 1.88076000  | 2.29343800  | -1.55603400 |
| O   | 0.11234700  | 1.84681000  | 0.87434600  |
| O   | 2.48012300  | -2.33632200 | 0.32818200  |
| O   | -0.34170600 | -2.10762500 | -1.40636100 |
| O   | 1.54793500  | 0.01034100  | -0.47865600 |
| O   | -0.29586900 | -0.99764100 | 0.89047400  |
| Al  | 2.92320800  | 1.07108300  | -0.98815000 |
| Al  | 3.13835500  | -0.80943900 | 0.82776100  |
| Al  | 0.39242100  | 1.56474900  | -0.89540100 |
| Al  | 0.91896200  | -1.88389600 | -0.25798200 |
| O   | 2.27888700  | -0.05287300 | 2.14505000  |
| O   | -1.03624800 | 0.80548600  | -1.45822700 |
| Al  | -1.27620700 | -0.77502900 | -0.74644200 |
| O   | 4.16230800  | 0.24752500  | -0.16609400 |
| Al  | 0.75755800  | 0.31538700  | 1.43151800  |
| C   | -2.51112400 | 2.44614700  | 1.24661200  |
| H   | -1.39032400 | 2.02484400  | 1.03739900  |
| H   | -2.60822600 | 2.52431800  | 2.32728700  |
| H   | -2.27663200 | 3.40169300  | 0.75965300  |
| C   | -3.59045600 | 1.82947400  | 0.58776400  |
| H   | -3.72116500 | 1.96051800  | -0.47932300 |
| H   | -4.44417100 | 1.45164800  | 1.13365600  |
| Br  | -3.55326200 | -0.79905600 | -0.02838100 |

**Al<sub>6</sub>O<sub>9</sub>---C<sub>2</sub>H<sub>5</sub>I reactant geometry:**  
**v1=16.56 cm<sup>-1</sup>**

|     |             |             |             |
|-----|-------------|-------------|-------------|
| 0 1 |             |             |             |
| O   | 2.28786700  | 2.48733500  | -1.30106200 |
| O   | 0.96629800  | 1.86155900  | 1.30766400  |
| O   | 2.86956400  | -2.39182300 | -0.06214900 |
| O   | -0.10223700 | -1.78971600 | -1.41649100 |
| O   | 1.95294200  | 0.06307300  | -0.49419600 |
| O   | 0.21448200  | -0.95695000 | 0.98253300  |
| Al  | 3.29413400  | 1.14508200  | -1.00488500 |
| Al  | 3.64555600  | -0.95228000 | 0.53898100  |
| Al  | 0.86254800  | 1.84826700  | -0.44026100 |
| Al  | 1.30152600  | -1.76446900 | -0.40437200 |
| O   | 2.96600900  | -0.39329900 | 2.03850600  |
| O   | -0.66936000 | 1.20023300  | -0.95578800 |
| Al  | -0.79350400 | -0.46960400 | -0.51068200 |
| O   | 4.58829900  | 0.19568100  | -0.43155500 |
| Al  | 1.42465000  | 0.23105100  | 1.58560600  |
| C   | -3.78912600 | 2.15525800  | 1.20099400  |
| H   | -4.60395900 | 1.77059600  | 1.81520500  |
| H   | -3.95096100 | 3.23137500  | 1.06856500  |
| H   | -2.84568200 | 2.02995600  | 1.73252600  |
| C   | -3.74926200 | 1.53910500  | -0.16582400 |
| I   | -3.45196600 | -0.66712600 | -0.06835100 |
| H   | -2.88322100 | 1.83375100  | -0.75568000 |
| H   | -4.67639600 | 1.62244200  | -0.72576600 |

**Al<sub>6</sub>O<sub>9</sub>---C<sub>2</sub>H<sub>5</sub>I TS1 geometry:**  
**v1=-503.70 cm<sup>-1</sup>**

|     |             |             |             |
|-----|-------------|-------------|-------------|
| 0 1 |             |             |             |
| O   | 2.33920600  | 2.21489000  | -1.58773400 |
| O   | 0.52627700  | 1.89222900  | 0.82601600  |
| O   | 2.69769300  | -2.40520900 | 0.37653500  |
| O   | -0.08844300 | -2.07466900 | -1.39883600 |
| O   | 1.88529600  | -0.02935700 | -0.47644100 |
| O   | -0.01908800 | -0.93266800 | 0.88176700  |
| Al  | 3.31642000  | 0.95668900  | -0.98336900 |
| Al  | 3.42095000  | -0.90410900 | 0.86362200  |
| Al  | 0.80971700  | 1.56543800  | -0.93829500 |
| Al  | 1.16639100  | -1.89125900 | -0.23704900 |
| O   | 2.58019600  | -0.08707500 | 2.15655900  |
| O   | -0.64682400 | 0.86651600  | -1.50470700 |
| Al  | -0.97089900 | -0.68958600 | -0.77293100 |

|    |             |             |             |
|----|-------------|-------------|-------------|
| O  | 4.50462600  | 0.08833400  | -0.13272200 |
| Al | 1.08685800  | 0.33826600  | 1.41625900  |
| C  | -1.99346800 | 2.76806000  | 1.18633400  |
| H  | -2.02599800 | 2.91702200  | 2.26407600  |
| H  | -1.68403400 | 3.66065900  | 0.62955900  |
| H  | -0.91152500 | 2.21956600  | 0.98742700  |
| C  | -3.16062700 | 2.21977400  | 0.62486800  |
| I  | -3.43595400 | -0.58750300 | -0.00396100 |
| H  | -3.36272100 | 2.33642000  | -0.43243900 |
| H  | -3.99977300 | 1.93233700  | 1.24352200  |

**Al<sub>12</sub>O<sub>18</sub>---C<sub>2</sub>H<sub>5</sub>F reactant geometry:**  
 **$\nu_1=18.56\text{ cm}^{-1}$**

|     |             |             |             |
|-----|-------------|-------------|-------------|
| 0 1 |             |             |             |
| O   | -3.56192600 | 1.71228600  | -0.04377100 |
| O   | -0.19571900 | -0.86247400 | 3.08119000  |
| O   | -0.48455900 | -1.13601300 | 0.50228400  |
| O   | -3.37678400 | -1.08269800 | -0.70333500 |
| Al  | -1.39403900 | -0.13781400 | 2.05107400  |
| Al  | -3.85725100 | 0.06675400  | 0.51026500  |
| Al  | 0.56676100  | -2.17932100 | -0.68771300 |
| O   | 1.61554700  | 1.22169600  | -0.41942000 |
| O   | 4.67383800  | -1.63677300 | 0.11059900  |
| Al  | 0.54165200  | 2.26739000  | 0.77440900  |
| Al  | 4.85620500  | 0.01032100  | -0.40235400 |
| O   | 1.30928000  | 0.95907500  | -2.99810900 |
| O   | -1.26024000 | 0.64174700  | -1.47721600 |
| O   | -0.39220600 | 2.87428300  | -0.70200200 |
| Al  | 0.27845300  | 1.51097700  | -1.75649900 |
| O   | 4.20412800  | 0.36765700  | -1.94333700 |
| Al  | 2.98713800  | -1.81144100 | 0.34023700  |
| O   | 4.49326800  | 1.18723200  | 0.78483900  |
| O   | -0.71481400 | -2.32959700 | -1.80011500 |
| O   | 2.09471500  | -1.39676600 | -1.22226500 |
| Al  | 2.49179400  | 0.22653300  | -1.96297500 |
| Al  | -1.71756500 | -1.08625900 | -1.10801000 |
| O   | -3.09115100 | -0.28179600 | 2.01595100  |
| O   | 1.82398900  | 2.41833700  | 1.88865800  |
| O   | -0.97310400 | 1.47754000  | 1.31044300  |
| Al  | 2.82736500  | 1.17814600  | 1.20968300  |
| Al  | -1.88214500 | 1.86858600  | -0.24680200 |
| O   | 2.38873800  | -0.56130000 | 1.55864100  |
| O   | 1.50467300  | -2.79465000 | 0.79171000  |
| Al  | 0.83174700  | -1.41541800 | 1.84124600  |

|   |             |             |             |
|---|-------------|-------------|-------------|
| C | -6.69537800 | -1.35670700 | -1.29506000 |
| H | -5.70414800 | -1.73163200 | -1.55312200 |
| H | -7.29045100 | -1.27959600 | -2.21052000 |
| H | -7.19437600 | -2.05325700 | -0.62095600 |
| C | -6.60215400 | 0.00628300  | -0.70211200 |
| H | -7.53164600 | 0.40860100  | -0.30892700 |
| H | -6.07792800 | 0.73626700  | -1.31577600 |
| F | -5.75212400 | -0.07555500 | 0.53345000  |

**Al<sub>12</sub>O<sub>18</sub>---C<sub>2</sub>H<sub>5</sub>F TS1 geometry:**

**v1=-452.07 cm<sup>-1</sup>**

0 1

|    |             |             |             |
|----|-------------|-------------|-------------|
| O  | -3.47546100 | 1.96155600  | -0.41220000 |
| O  | -0.30678400 | -0.25211100 | 3.15206400  |
| O  | -0.57912700 | -0.94175500 | 0.64863500  |
| O  | -3.44899700 | -0.92154000 | -0.59856700 |
| Al | -1.45186000 | 0.36628400  | 1.99888000  |
| Al | -3.96544800 | 0.48254900  | 0.40157100  |
| Al | 0.42662200  | -2.23879600 | -0.32271600 |
| O  | 1.66565100  | 1.10491100  | -0.60329200 |
| O  | 4.54494700  | -1.79375400 | 0.45402400  |
| Al | 0.64674300  | 2.40278700  | 0.38036600  |
| Al | 4.83001300  | -0.26835400 | -0.32228000 |
| O  | 1.35699600  | 0.42622400  | -3.10131200 |
| O  | -1.23643000 | 0.52868300  | -1.59465500 |
| O  | -0.23698000 | 2.80265600  | -1.19237400 |
| Al | 0.35493900  | 1.24783900  | -1.99170800 |
| O  | 4.20826700  | -0.13562700 | -1.91075900 |
| Al | 2.84942900  | -1.82812900 | 0.68010000  |
| O  | 4.52521500  | 1.10666900  | 0.64826100  |
| O  | -0.86530400 | -2.49377600 | -1.40780700 |
| O  | 1.99731600  | -1.63663900 | -0.94777100 |
| Al | 2.49046700  | -0.17845100 | -1.93661700 |
| Al | -1.76410600 | -1.07688200 | -0.93972100 |
| O  | -3.14250800 | 0.28736700  | 1.91626000  |
| O  | 1.92695100  | 2.66028000  | 1.47709100  |
| O  | -0.91293100 | 1.80136800  | 1.01410400  |
| Al | 2.85807300  | 1.26776500  | 1.03482700  |
| Al | -1.79483300 | 1.98196400  | -0.59567000 |
| O  | 2.31221300  | -0.36247500 | 1.65958600  |
| O  | 1.30390200  | -2.63787900 | 1.25987500  |
| Al | 0.70117600  | -1.06151300 | 2.04553200  |
| C  | -5.82212000 | -2.06804500 | -1.08372700 |
| H  | -4.70779800 | -1.61882100 | -0.90328300 |

|   |             |             |             |
|---|-------------|-------------|-------------|
| H | -5.90776300 | -2.05671800 | -2.16930500 |
| H | -5.75081300 | -3.06370300 | -0.64879600 |
| C | -6.70511200 | -1.19352100 | -0.41486300 |
| H | -7.10721800 | -1.44675400 | 0.55748200  |
| H | -7.25763000 | -0.43926900 | -0.96008000 |
| F | -5.72851500 | 0.21106400  | 0.42254300  |

**Al<sub>12</sub>O<sub>18</sub>---C<sub>2</sub>H<sub>5</sub>Cl reactant geometry:**  
**v1=15.43 cm<sup>-1</sup>**

|     |             |             |             |
|-----|-------------|-------------|-------------|
| 0 1 |             |             |             |
| O   | -3.20355000 | 2.17586900  | -0.18759300 |
| O   | -0.30505100 | -0.87874600 | 2.95427300  |
| O   | -0.46286300 | -0.99778300 | 0.35252800  |
| O   | -3.25742900 | -0.61327500 | -0.99707700 |
| Al  | -1.36202000 | 0.01564200  | 1.90268700  |
| Al  | -3.69864900 | 0.54780500  | 0.22778800  |
| Al  | 0.55263100  | -2.08501500 | -0.83157900 |
| O   | 1.91442400  | 1.17405300  | -0.32105200 |
| O   | 4.63667100  | -2.00135600 | 0.21889600  |
| Al  | 0.87999500  | 2.26515700  | 0.86948900  |
| Al  | 5.01094100  | -0.35846800 | -0.19376300 |
| O   | 1.72779400  | 1.06264200  | -2.92157200 |
| O   | -0.94429900 | 0.94499800  | -1.55684600 |
| O   | 0.09983600  | 3.03466800  | -0.61973400 |
| Al  | 0.68899100  | 1.66168400  | -1.70888200 |
| O   | 4.48920200  | 0.13755500  | -1.74549000 |
| Al  | 2.93057800  | -2.01458500 | 0.34706700  |
| O   | 4.69776300  | 0.78939100  | 1.03502500  |
| O   | -0.67205200 | -2.05301200 | -2.01588000 |
| O   | 2.17861600  | -1.44066700 | -1.24045600 |
| Al  | 2.77497300  | 0.17011200  | -1.86709200 |
| Al  | -1.58084500 | -0.74515900 | -1.31162900 |
| O   | -3.05863800 | 0.03432300  | 1.75105100  |
| O   | 2.10265400  | 2.23106600  | 2.05729400  |
| O   | -0.73494500 | 1.61285000  | 1.28326200  |
| Al  | 3.01724200  | 0.93059000  | 1.36677200  |
| Al  | -1.50900800 | 2.17340900  | -0.29746900 |
| O   | 2.38633500  | -0.77010500 | 1.59601500  |
| O   | 1.33209900  | -2.86121000 | 0.66346500  |
| Al  | 0.73745100  | -1.47011700 | 1.74488100  |
| C   | -6.62810000 | -2.41167800 | -0.03431600 |
| H   | -5.83860400 | -2.62577500 | 0.68584100  |
| H   | -6.73860000 | -3.28904800 | -0.68143400 |
| H   | -7.57094100 | -2.25934200 | 0.49137600  |

|    |             |             |             |
|----|-------------|-------------|-------------|
| C  | -6.27318000 | -1.25960700 | -0.91547100 |
| H  | -7.05040400 | -0.95637400 | -1.60968500 |
| H  | -5.29230100 | -1.32717700 | -1.38244100 |
| Cl | -6.07433100 | 0.33244900  | 0.14815700  |

**Al<sub>12</sub>O<sub>18</sub>---C<sub>2</sub>H<sub>5</sub>Cl TS1 geometry:**  
**v1=-319.59 cm<sup>-1</sup>**

|     |             |             |             |
|-----|-------------|-------------|-------------|
| 0 1 |             |             |             |
| O   | 3.27811100  | -2.00640000 | -0.59142900 |
| O   | 0.18461000  | 0.00686900  | 3.14879300  |
| O   | 0.44590200  | 0.86130200  | 0.69497700  |
| O   | 3.30583900  | 0.88111100  | -0.57572500 |
| Al  | 1.30730600  | -0.55465600 | 1.94642000  |
| Al  | 3.80034900  | -0.59321400 | 0.31123500  |
| Al  | -0.54135900 | 2.24400400  | -0.17314600 |
| O   | -1.84744300 | -1.05313300 | -0.66792100 |
| O   | -4.65977000 | 1.82190900  | 0.61258600  |
| Al  | -0.84455800 | -2.43507100 | 0.21483700  |
| Al  | -4.98099300 | 0.35964800  | -0.26462800 |
| O   | -1.54747700 | -0.20917400 | -3.11771300 |
| O   | 1.05292900  | -0.46283400 | -1.64540400 |
| O   | 0.01706400  | -2.74142700 | -1.39105000 |
| Al  | -0.55445000 | -1.12539600 | -2.07606900 |
| O   | -4.37649700 | 0.32655400  | -1.86483000 |
| Al  | -2.96227800 | 1.80881300  | 0.82325500  |
| O   | -4.69524300 | -1.08518300 | 0.60452900  |
| O   | 0.74984000  | 2.54779900  | -1.24702900 |
| O   | -2.12805100 | 1.71629000  | -0.82443700 |
| Al  | -2.65878400 | 0.33910500  | -1.90554600 |
| Al  | 1.61742500  | 1.08014600  | -0.88499900 |
| O   | 2.99819900  | -0.49339300 | 1.84645600  |
| O   | -2.12121000 | -2.74129400 | 1.30282800  |
| O   | 0.73329700  | -1.90901800 | 0.87270100  |
| Al  | -3.02839300 | -1.30464900 | 0.96204900  |
| Al  | 1.59491000  | -1.99193800 | -0.75733900 |
| O   | -2.44404500 | 0.26779700  | 1.69072900  |
| O   | -1.39656400 | 2.54730000  | 1.44195900  |
| Al  | -0.81769700 | 0.90844700  | 2.11026500  |
| C   | 5.46240900  | 2.45368700  | -1.01178700 |
| H   | 4.48496600  | 1.79295700  | -0.83643500 |
| H   | 5.48605400  | 2.57319400  | -2.09462900 |
| H   | 5.21896000  | 3.36811600  | -0.47029800 |
| C   | 6.58385600  | 1.76356100  | -0.48521100 |
| H   | 6.97464500  | 2.01227900  | 0.49291300  |



|    |            |             |             |
|----|------------|-------------|-------------|
| H  | 7.27388500 | 1.24680100  | -1.13946800 |
| Cl | 6.04581000 | -0.35620900 | 0.39572800  |

**Al<sub>12</sub>O<sub>18</sub>---C<sub>2</sub>H<sub>5</sub>Br reactant geometry:  
ν<sub>1</sub>=19.96 cm<sup>-1</sup>**

|     |             |             |             |
|-----|-------------|-------------|-------------|
| 0 1 |             |             |             |
| O   | 2.89389600  | -2.14462700 | -0.23324100 |
| O   | -0.01126700 | 0.85253300  | 2.95789900  |
| O   | 0.13312100  | 1.00350400  | 0.35810100  |
| O   | 2.92624100  | 0.65621400  | -1.01119900 |
| Al  | 1.04603500  | -0.01988800 | 1.88747600  |
| Al  | 3.38246800  | -0.51680300 | 0.19742900  |
| Al  | -0.89438800 | 2.09699400  | -0.80793800 |
| O   | -2.23171900 | -1.17624900 | -0.33277700 |
| O   | -4.97349000 | 1.97368900  | 0.25797500  |
| Al  | -1.18433500 | -2.27445700 | 0.83984900  |
| Al  | -5.33823900 | 0.33328200  | -0.17275400 |
| O   | -2.05727800 | -1.03161800 | -2.93203400 |
| O   | 0.62042500  | -0.91170000 | -1.57746400 |
| O   | -0.40535300 | -3.02002000 | -0.66203700 |
| Al  | -1.00836400 | -1.63797300 | -1.73180300 |
| O   | -4.81989100 | -0.14075000 | -1.73243400 |
| Al  | -3.26702700 | 1.99723900  | 0.37899100  |
| O   | -5.01182200 | -0.82746600 | 1.04042900  |
| O   | 0.32469700  | 2.08942000  | -1.99844000 |
| O   | -2.51797900 | 1.44741000  | -1.21848500 |
| Al  | -3.10591700 | -0.16024900 | -1.86126800 |
| Al  | 1.24741600  | 0.77957800  | -1.31678200 |
| O   | 2.74215200  | -0.02631500 | 1.72932300  |
| O   | -2.40247800 | -2.26429900 | 2.03272700  |
| O   | 0.42748600  | -1.61600100 | 1.25536800  |
| Al  | -3.32875500 | -0.96147800 | 1.36247400  |
| Al  | 1.19888700  | -2.15156300 | -0.33527500 |
| O   | -2.70891300 | 0.74076800  | 1.61027600  |
| O   | -1.67315700 | 2.85063500  | 0.69935100  |
| Al  | -1.06489500 | 1.45106600  | 1.76203000  |
| C   | 6.20316900  | 2.63617700  | -0.04196500 |
| H   | 5.42015100  | 2.75146600  | 0.70753700  |
| H   | 6.20685700  | 3.54021300  | -0.66175500 |
| H   | 7.17170400  | 2.56631900  | 0.45411700  |
| C   | 5.93613900  | 1.47855200  | -0.95133300 |
| H   | 6.71579700  | 1.28381000  | -1.68156700 |
| H   | 4.94069700  | 1.47273400  | -1.39231400 |
| Br  | 5.90840100  | -0.28881900 | 0.11301300  |

**Al<sub>12</sub>O<sub>18</sub>---C<sub>2</sub>H<sub>5</sub>Br TS1 geometry:****v1=-357.32 cm<sup>-1</sup>**

0 1

|    |             |             |             |
|----|-------------|-------------|-------------|
| O  | 2.96600000  | -1.94678800 | -0.72072700 |
| O  | -0.09743000 | -0.10337300 | 3.13044900  |
| O  | 0.12580500  | 0.84641000  | 0.70729800  |
| O  | 2.96945800  | 0.93885600  | -0.59740700 |
| Al | 1.01521100  | -0.61207500 | 1.89636800  |
| Al | 3.49457300  | -0.56551100 | 0.22786600  |
| Al | -0.88301200 | 2.25467400  | -0.09392800 |
| O  | -2.16763500 | -1.03689600 | -0.69760100 |
| O  | -4.98709200 | 1.76542400  | 0.72298000  |
| Al | -1.14373300 | -2.44305800 | 0.12098900  |
| Al | -5.30669700 | 0.33572200  | -0.20689700 |
| O  | -1.90255200 | -0.09781600 | -3.11730300 |
| O  | 0.71479800  | -0.38620100 | -1.68468200 |
| O  | -0.29882800 | -2.68137000 | -1.50548900 |
| Al | -0.89235500 | -1.04612800 | -2.12200400 |
| O  | -4.72097800 | 0.36932300  | -1.81392200 |
| Al | -3.28743500 | 1.75881200  | 0.91371500  |
| O  | -4.99992900 | -1.13908200 | 0.60239600  |
| O  | 0.39437000  | 2.60711500  | -1.16991900 |
| O  | -2.47203400 | 1.73702800  | -0.74678400 |
| Al | -3.00416300 | 0.39799700  | -1.87437600 |
| Al | 1.27122500  | 1.13036600  | -0.87190900 |
| O  | 2.70324500  | -0.52798300 | 1.77232200  |
| O  | -2.40582900 | -2.79966500 | 1.21031800  |
| O  | 0.43832400  | -1.92962300 | 0.77984300  |
| Al | -3.32752100 | -1.35843200 | 0.93228200  |
| Al | 1.28055300  | -1.94371800 | -0.86281900 |
| O  | -2.74593300 | 0.18947800  | 1.71412300  |
| O  | -1.72036400 | 2.48612800  | 1.54181700  |
| Al | -1.12013900 | 0.82746300  | 2.13875800  |
| C  | 4.97568500  | 2.66282200  | -1.02409400 |
| H  | 4.05607400  | 1.90177400  | -0.83674300 |
| H  | 4.91445400  | 2.82939100  | -2.09942500 |
| H  | 4.67557800  | 3.51994500  | -0.42119600 |
| C  | 6.18039200  | 2.05475900  | -0.60115000 |
| H  | 6.61395100  | 2.29799900  | 0.36012100  |
| H  | 6.86201300  | 1.61908900  | -1.32007000 |
| Br | 5.89542100  | -0.29631100 | 0.29921400  |

**Al<sub>12</sub>O<sub>18</sub>---C<sub>2</sub>H<sub>5</sub>I reactant geometry:**  
**v1=5.92 cm<sup>-1</sup>**

|     |             |             |             |
|-----|-------------|-------------|-------------|
| 0 1 |             |             |             |
| O   | -2.58863800 | -2.14362700 | -0.23797100 |
| O   | -0.00338600 | 2.07566900  | -2.02010500 |
| O   | 0.17609600  | 1.00523800  | 0.34481000  |
| O   | -2.44116100 | -0.01038300 | 1.70930700  |
| Al  | -0.93272100 | 0.77217500  | -1.33515700 |
| Al  | -3.07932300 | -0.51054300 | 0.17754900  |
| Al  | 1.36860600  | 1.45943100  | 1.75068400  |
| O   | 2.53974800  | -1.18364700 | -0.32153000 |
| O   | 5.28447600  | 1.96549900  | 0.25997300  |
| Al  | 1.32159200  | -1.65180000 | -1.72258300 |
| Al  | 5.64805900  | 0.32149600  | -0.15773000 |
| O   | 2.69796400  | -2.25652600 | 2.05151700  |
| O   | -0.12761300 | -1.60803100 | 1.25798000  |
| O   | 0.71122700  | -3.02593800 | -0.64646700 |
| Al  | 1.48447400  | -2.27204500 | 0.85386000  |
| O   | 5.31439600  | -0.83044200 | 1.06185000  |
| Al  | 3.57747100  | 1.99274900  | 0.37350300  |
| O   | 5.13564900  | -0.16212900 | -1.71644500 |
| O   | 0.30806200  | 0.87123300  | 2.94566400  |
| O   | 3.01197700  | 0.74537600  | 1.61049400  |
| Al  | 3.62943200  | -0.95995600 | 1.37631100  |
| Al  | -0.74578000 | -0.00575600 | 1.87498600  |
| O   | -2.61241200 | 0.65493300  | -1.03506900 |
| O   | 2.37670000  | -1.05558700 | -2.92253700 |
| O   | -0.30648300 | -0.92186400 | -1.58006000 |
| Al  | 3.42224600  | -0.17862000 | -1.85335700 |
| Al  | -0.89307200 | -2.15204400 | -0.33255000 |
| O   | 2.83433200  | 1.43398800  | -1.22352400 |
| O   | 1.98395600  | 2.85123400  | 0.68141000  |
| Al  | 1.21008200  | 2.08862600  | -0.82401500 |
| C   | -5.67838200 | 2.85636600  | 0.02488100  |
| H   | -6.62997200 | 2.89943200  | 0.55596200  |
| H   | -5.57052400 | 3.78574600  | -0.54628900 |
| H   | -4.86570000 | 2.81886500  | 0.75045300  |
| C   | -5.60855500 | 1.71890200  | -0.95105400 |
| I   | -5.78583400 | -0.24991400 | 0.07135400  |
| H   | -4.63866400 | 1.61344800  | -1.43422000 |
| H   | -6.42727600 | 1.68808600  | -1.66449000 |

**Al<sub>12</sub>O<sub>18</sub>---C<sub>2</sub>H<sub>5</sub>I TS1 geometry:**  
**v1=-480.97 cm<sup>-1</sup>**

0 1

|    |             |             |             |
|----|-------------|-------------|-------------|
| O  | -2.66199000 | -1.88935000 | 0.83720800  |
| O  | 0.38891100  | -0.25042200 | -3.11626500 |
| O  | 0.18638000  | 0.81565000  | -0.73944800 |
| O  | -2.65186000 | 0.98825600  | 0.57885100  |
| Al | -0.71841800 | -0.69485600 | -1.85337100 |
| Al | -3.19703100 | -0.55392100 | -0.17374300 |
| Al | 1.20569900  | 2.25748000  | -0.01489800 |
| O  | 2.47514800  | -1.00835800 | 0.74121400  |
| O  | 5.30187500  | 1.70652800  | -0.82752200 |
| Al | 1.44199600  | -2.44749200 | -0.00264700 |
| Al | 5.61910300  | 0.32228100  | 0.16946700  |
| O  | 2.22794000  | 0.04634800  | 3.11438900  |
| O  | -0.39855400 | -0.29808100 | 1.71106900  |
| O  | 0.60385400  | -2.60383400 | 1.63702400  |
| Al | 1.20814800  | -0.94413300 | 2.17167500  |
| O  | 5.04166600  | 0.43590600  | 1.77563700  |
| Al | 3.60148000  | 1.69959000  | -1.01004400 |
| O  | 5.30132300  | -1.18832700 | -0.56616800 |
| O  | -0.06585400 | 2.66666900  | 1.04833800  |
| O  | 2.79466000  | 1.76179900  | 0.65364800  |
| Al | 3.32530600  | 0.47637700  | 1.84323700  |
| Al | -0.94609900 | 1.17871500  | 0.82609700  |
| O  | -2.40401500 | -0.58969800 | -1.71827800 |
| O  | 2.69636000  | -2.86323400 | -1.07957800 |
| O  | -0.14165500 | -1.95947400 | -0.67782200 |
| Al | 3.62654300  | -1.41493900 | -0.87727700 |
| Al | -0.97578700 | -1.89132500 | 0.96726100  |
| O  | 3.04804300  | 0.09564000  | -1.73180500 |
| O  | 2.03434000  | 2.40360800  | -1.66417300 |
| Al | 1.42296500  | 0.72099700  | -2.17695700 |
| C  | -4.51198400 | 2.82826500  | 1.03532900  |
| H  | -4.36192400 | 3.00393800  | 2.10054100  |
| H  | -4.16389800 | 3.63592400  | 0.39152900  |
| H  | -3.65380600 | 1.97659700  | 0.81861900  |
| C  | -5.78542600 | 2.32356500  | 0.70140800  |
| I  | -5.78339000 | -0.25359500 | -0.24657100 |
| H  | -6.25609100 | 2.58651800  | -0.23694500 |
| H  | -6.45346600 | 1.95550200  | 1.46916500  |

**Al<sub>20</sub>---C<sub>2</sub>H<sub>5</sub>I reactant geometry:**  
**v1=13.25 cm<sup>-1</sup>**

|     |             |             |             |
|-----|-------------|-------------|-------------|
| 0 1 |             |             |             |
| Al  | 1.28970600  | 1.52816200  | -1.61687800 |
| Al  | 1.27050400  | 1.80628600  | 1.34098000  |
| Al  | 0.98722400  | -0.83809100 | 2.42761600  |
| Al  | 0.84933400  | -2.69282200 | 0.26853300  |
| Al  | 1.00497000  | -1.28973200 | -2.20125600 |
| Al  | 2.34420200  | -0.38023100 | 0.05584400  |
| Al  | -0.13743700 | -0.13519500 | 0.01756300  |
| Al  | -1.14261400 | 0.42360300  | -2.42872100 |
| Al  | -0.91506200 | 2.43437700  | -0.21880400 |
| Al  | -1.17673100 | 0.86572800  | 2.30560400  |
| Al  | -1.42366600 | -1.91069100 | 1.61009800  |
| Al  | -1.42044000 | -2.17938300 | -1.21159100 |
| Al  | -3.91003900 | -1.32199100 | -2.13630300 |
| Al  | -3.76681300 | 1.25679800  | -2.40347600 |
| Al  | -3.62422100 | 2.79984900  | -0.31837400 |
| Al  | -3.77639300 | 1.75722000  | 2.05687000  |
| Al  | -3.88783900 | -0.81760400 | 2.36980500  |
| Al  | -3.96152600 | -2.37350700 | 0.25970400  |
| Al  | -2.64752700 | 0.15622000  | -0.02436800 |
| Al  | -5.16642500 | 0.26804100  | -0.02988600 |
| C   | 5.57568800  | 1.55380000  | -0.70527100 |
| C   | 5.80258000  | 2.51570100  | 0.42646000  |
| H   | 4.64828700  | 1.73284000  | -1.24680600 |
| H   | 5.91307700  | 3.51949200  | 0.00150700  |
| H   | 4.95640000  | 2.53849900  | 1.11425500  |
| H   | 6.70887200  | 2.28648900  | 0.98821500  |
| H   | 6.40983900  | 1.47753400  | -1.39728500 |
| I   | 5.33649500  | -0.52100600 | 0.01159500  |

**Al<sub>20</sub>---C<sub>2</sub>H<sub>5</sub>I TS1 geometry:**  
**v1=-148.14 cm<sup>-1</sup>**

|     |             |             |             |
|-----|-------------|-------------|-------------|
| 0 1 |             |             |             |
| Al  | -1.24174300 | 0.25771800  | -2.36620000 |
| Al  | -0.88164500 | -2.39981500 | -1.41559900 |
| Al  | -0.88152900 | -2.40020800 | 1.41510600  |
| Al  | -1.24159600 | 0.25708800  | 2.36644000  |
| Al  | -1.43492400 | 1.95813200  | 0.00034400  |
| Al  | -2.44637400 | -0.57603700 | 0.00006200  |
| Al  | 0.05467500  | -0.24617200 | 0.00002000  |

|    |             |             |             |
|----|-------------|-------------|-------------|
| Al | 0.84583500  | 1.85005000  | -1.52695500 |
| Al | 1.26154000  | -0.90371600 | -2.31721200 |
| Al | 1.47089800  | -2.55231300 | -0.00039200 |
| Al | 1.26170700  | -0.90438400 | 2.31698100  |
| Al | 0.84588500  | 1.84967700  | 1.52749000  |
| Al | 3.48543500  | 2.53470000  | 1.29664300  |
| Al | 3.48532700  | 2.53529100  | -1.29559900 |
| Al | 3.76114000  | 0.32058900  | -2.61021100 |
| Al | 3.88502400  | -1.92637200 | -1.33428700 |
| Al | 3.88517400  | -1.92698600 | 1.33320400  |
| Al | 3.76149400  | 0.31937600  | 2.61016400  |
| Al | 2.57679100  | 0.19814700  | 0.00003500  |
| Al | 5.12931000  | 0.39153100  | -0.00008900 |
| C  | -5.79459500 | 2.14199900  | -0.00007100 |
| C  | -4.68992700 | 3.06301000  | 0.00012800  |
| H  | -6.33153600 | 1.93846500  | 0.91619200  |
| H  | -4.64298800 | 3.67305300  | -0.90199400 |
| H  | -4.64305800 | 3.67283600  | 0.90239300  |
| H  | -3.65643100 | 2.53722700  | 0.00003600  |
| H  | -6.33119100 | 1.93851400  | -0.91655200 |
| I  | -5.09545600 | -0.51437700 | 0.00000500  |

**Al<sub>20</sub>---C<sub>2</sub>H<sub>5</sub>I product-1 geometry:**  
**v1=4.96 cm<sup>-1</sup>**

|     |             |             |             |
|-----|-------------|-------------|-------------|
| 0 1 |             |             |             |
| Al  | 1.03707600  | -0.24953100 | 2.44288500  |
| Al  | 0.47218200  | -2.65536700 | 1.07189300  |
| Al  | 0.57382400  | -2.18040800 | -1.75750200 |
| Al  | 1.20862100  | 0.53358300  | -2.22100100 |
| Al  | 1.42573600  | 1.74973500  | 0.39784500  |
| Al  | 2.30922700  | -0.85247700 | -0.01397300 |
| Al  | -0.19811300 | -0.23695600 | -0.00238900 |
| Al  | -0.95607000 | 1.61564200  | 1.84401000  |
| Al  | -1.52983800 | -1.15281600 | 2.15572800  |
| Al  | -1.85923100 | -2.31843400 | -0.41054500 |
| Al  | -1.36472000 | -0.38405600 | -2.42879500 |
| Al  | -0.84008600 | 2.12465700  | -1.19351500 |
| Al  | -3.45539700 | 2.97853500  | -0.90447400 |
| Al  | -3.55610500 | 2.55169600  | 1.65297800  |
| Al  | -3.94379400 | 0.20857200  | 2.62943300  |
| Al  | -4.15471400 | -1.75453400 | 0.98442100  |
| Al  | -4.05916700 | -1.31164000 | -1.70081700 |
| Al  | -3.76175200 | 1.07599700  | -2.60327100 |
| Al  | -2.69663500 | 0.43354400  | 0.01742700  |

|    |             |             |             |
|----|-------------|-------------|-------------|
| Al | -5.28766700 | 0.72331300  | -0.02468500 |
| C  | 8.53454100  | 3.26651200  | 0.20291000  |
| C  | 9.30587000  | 4.31317800  | -0.05273800 |
| H  | 8.00389200  | 2.74107700  | -0.58437000 |
| H  | 9.83557500  | 4.83816000  | 0.73551600  |
| H  | 9.44103200  | 4.69003100  | -1.06128000 |
| H  | 2.39618700  | 2.97906700  | 0.63527200  |
| H  | 8.39911400  | 2.88936700  | 1.21138300  |
| I  | 4.77656300  | -1.42082200 | -0.01888800 |

**Al<sub>20</sub>---C<sub>2</sub>H<sub>5</sub>I TS2 geometry:**

**v1=-214.91 cm<sup>-1</sup>**

0 1

|    |             |             |             |
|----|-------------|-------------|-------------|
| Al | 1.25848500  | 0.27661200  | 2.34849200  |
| Al | 0.86263100  | -2.39521700 | 1.43090400  |
| Al | 0.86242100  | -2.39631200 | -1.42954700 |
| Al | 1.25800300  | 0.27480000  | -2.34932900 |
| Al | 1.44671100  | 2.01011800  | -0.00130100 |
| Al | 2.44737800  | -0.65894700 | -0.00016400 |
| Al | -0.04024600 | -0.22546000 | -0.00008000 |
| Al | -0.85600500 | 1.86529300  | 1.51969000  |
| Al | -1.25044400 | -0.88597900 | 2.32567000  |
| Al | -1.48199100 | -2.51916700 | 0.00095200  |
| Al | -1.25084600 | -0.88791800 | -2.32508100 |
| Al | -0.85660500 | 1.86391600  | -1.52149600 |
| Al | -3.50592600 | 2.52383300  | -1.29699000 |
| Al | -3.50534500 | 2.52476300  | 1.29594500  |
| Al | -3.75049600 | 0.31286300  | 2.61372800  |
| Al | -3.88851500 | -1.93557200 | 1.32938500  |
| Al | -3.88875100 | -1.93625900 | -1.32766100 |
| Al | -3.75065600 | 0.31127000  | -2.61368600 |
| Al | -2.56947400 | 0.19663800  | 0.00007400  |
| Al | -5.12578100 | 0.35890500  | 0.00014200  |
| C  | 4.44988900  | 2.09765200  | -0.00052300 |
| C  | 5.50580400  | 3.12907800  | 0.00014600  |
| H  | 3.95883200  | 1.83326200  | -0.92447500 |
| H  | 6.12949300  | 3.07192000  | 0.89335600  |
| H  | 6.12873700  | 3.07409400  | -0.89374600 |
| H  | 5.03398800  | 4.12149500  | 0.00164100  |
| H  | 3.95798200  | 1.83295400  | 0.92292500  |
| I  | 5.16354200  | -0.53038600 | 0.00013500  |

**Al<sub>20</sub>---C<sub>2</sub>H<sub>5</sub>I product-2 geometry:**  
**v1=8.97 cm<sup>-1</sup>**

|     |             |             |             |
|-----|-------------|-------------|-------------|
| 0 1 |             |             |             |
| Al  | -1.39167400 | 0.37729400  | -2.36759500 |
| Al  | -1.25249100 | -2.28528500 | -1.43194800 |
| Al  | -1.25332700 | -2.28704800 | 1.42838400  |
| Al  | -1.39113500 | 0.37285000  | 2.36910300  |
| Al  | -1.42042200 | 2.06651500  | 0.00730700  |
| Al  | -2.73365200 | -0.39516000 | -0.00066700 |
| Al  | -0.16485600 | -0.22630100 | -0.00039100 |
| Al  | 0.89610400  | 1.73921100  | -1.54267300 |
| Al  | 0.97611900  | -0.99485700 | -2.32213800 |
| Al  | 1.10447700  | -2.61199600 | -0.00101600 |
| Al  | 0.97573800  | -0.99758400 | 2.32087100  |
| Al  | 0.89857600  | 1.73646100  | 1.54540700  |
| Al  | 3.62529700  | 2.16636900  | 1.29686200  |
| Al  | 3.62247100  | 2.16763900  | -1.29810200 |
| Al  | 3.59079800  | -0.01334800 | -2.65384000 |
| Al  | 3.45832300  | -2.23233900 | -1.36237000 |
| Al  | 3.45847900  | -2.23127400 | 1.36169600  |
| Al  | 3.58891200  | -0.01293800 | 2.65441300  |
| Al  | 2.41692500  | -0.01450300 | -0.00061600 |
| Al  | 5.01902400  | -0.19668100 | 0.00034500  |
| C   | -2.38425200 | 3.81446800  | -0.00124700 |
| C   | -1.49943600 | 5.05927200  | -0.00145500 |
| H   | -3.04332600 | 3.80344800  | 0.87240800  |
| H   | -2.10389000 | 5.97261700  | -0.00680300 |
| H   | -0.85555200 | 5.10120800  | 0.88071000  |
| H   | -0.84829000 | 5.09565700  | -0.87853000 |
| H   | -3.03670200 | 3.79838900  | -0.87975000 |
| I   | -5.26637800 | -0.50311500 | -0.00021200 |

.....

**Hydrated alumina clusters (with one H<sub>2</sub>O molecule)-**

**Al<sub>8</sub>O<sub>12</sub>---C<sub>2</sub>H<sub>5</sub>F reactant geometry:**  
**v1=35.67 cm<sup>-1</sup>**

|     |             |             |            |
|-----|-------------|-------------|------------|
| 0 1 |             |             |            |
| O   | -1.23541500 | 0.95005800  | 0.06039800 |
| O   | 0.49991600  | 3.25348100  | 0.70729500 |
| Al  | -0.57437000 | -0.21274400 | 1.25732200 |



|    |             |             |             |
|----|-------------|-------------|-------------|
| Al | -1.66303100 | 0.57195100  | -1.72444100 |
| O  | 2.25997400  | -0.91953600 | -0.81417000 |
| O  | 0.42402300  | -3.08013100 | -1.56939400 |
| Al | 2.53374600  | -0.38228700 | 0.97229100  |
| O  | 1.34593900  | 1.81384600  | -1.12501500 |
| O  | 3.31863900  | 1.19132400  | 0.93203900  |
| Al | -0.86704700 | -1.86336100 | -1.56851100 |
| O  | -1.42107400 | 2.28986500  | -2.01440100 |
| O  | -0.11392600 | -0.32832900 | -2.38131100 |
| Al | 1.35897000  | 0.22390200  | -1.72811100 |
| Al | -0.37580800 | 2.47897200  | -0.60829800 |
| O  | 2.07508400  | -2.07296000 | 1.38020200  |
| O  | 1.01161100  | 0.53321100  | 1.46643000  |
| Al | 1.21380900  | -2.35191800 | -0.17401300 |
| Al | 1.77711900  | 2.04169000  | 0.70673500  |
| O  | -0.42153300 | -1.61003800 | 0.20555000  |
| O  | -2.41209300 | -1.02664300 | -1.76013700 |
| C  | -4.27883100 | -0.51684600 | 1.26755200  |
| H  | -3.79469900 | -0.80408700 | 0.33023200  |
| H  | -5.26300800 | -0.10384200 | 1.02335700  |
| H  | -4.42966000 | -1.39564400 | 1.89563500  |
| C  | -3.51735500 | 0.54464700  | 1.98472000  |
| H  | -3.92118600 | 0.82331000  | 2.95469800  |
| H  | -3.27027900 | 1.41024100  | 1.37704000  |
| F  | -2.17322000 | -0.00336200 | 2.35967200  |
| O  | -0.09483500 | -1.46024900 | 2.77435000  |
| H  | 0.10231600  | -1.08045900 | 3.63669200  |
| H  | 0.77810400  | -1.83791200 | 2.40832700  |

**Al<sub>8</sub>O<sub>12</sub>---C<sub>2</sub>H<sub>5</sub>F TS1 geometry:**  
**v1=-497.70 cm<sup>-1</sup>**

|     |             |             |             |
|-----|-------------|-------------|-------------|
| 0 1 |             |             |             |
| O   | -0.71873800 | 1.27896000  | 0.55172900  |
| O   | 1.69189900  | 2.63975000  | 1.53256300  |
| Al  | -0.52753100 | -0.34695100 | 1.33441000  |
| Al  | -1.40986100 | 1.65091700  | -1.08612600 |
| O   | 1.77184700  | -1.16890900 | -1.34919400 |
| O   | -0.70851200 | -2.35177300 | -2.33036700 |
| Al  | 2.35111300  | -1.34401100 | 0.45032400  |
| O   | 1.83747600  | 1.66764200  | -0.74926500 |
| O   | 3.61410500  | -0.15033000 | 0.70402300  |
| Al  | -1.47781700 | -0.87708800 | -1.74169800 |
| O   | -0.64554500 | 3.22389800  | -0.97856000 |
| O   | -0.39610600 | 0.55957500  | -2.25957600 |

|    |             |             |             |
|----|-------------|-------------|-------------|
| Al | 1.23122900  | 0.41572300  | -1.72082600 |
| Al | 0.50968500  | 2.63611700  | 0.23325000  |
| O  | 1.43466400  | -2.88583200 | 0.42001600  |
| O  | 1.25480900  | -0.22822700 | 1.42146800  |
| Al | 0.39418500  | -2.37930800 | -0.94428700 |
| Al | 2.43492600  | 1.14111100  | 0.99223300  |
| O  | -0.86199300 | -1.34102600 | -0.09720500 |
| O  | -2.69241100 | 0.40046200  | -1.34152600 |
| C  | -4.33051300 | -0.01393600 | 0.75269200  |
| H  | -3.47632300 | 0.15902000  | -0.11436700 |
| H  | -4.90333200 | 0.90050300  | 0.58962900  |
| H  | -4.81768800 | -0.90675500 | 0.35979400  |
| C  | -3.89517500 | -0.15634500 | 2.08811700  |
| H  | -3.89245600 | -1.12824800 | 2.56269700  |
| H  | -3.92154300 | 0.68800300  | 2.76356300  |
| F  | -1.99473700 | -0.16172500 | 2.36244100  |
| O  | -0.29522700 | -2.15982500 | 2.33176000  |
| H  | 0.07741000  | -2.13767100 | 3.21852800  |
| H  | 0.37348100  | -2.62718200 | 1.74175200  |

**Al<sub>8</sub>O<sub>12</sub>---C<sub>2</sub>H<sub>5</sub>F product-1 geometry:**  
**v1=25.65 cm<sup>-1</sup>**

|     |             |             |             |
|-----|-------------|-------------|-------------|
| 0 1 |             |             |             |
| O   | -0.72369300 | 1.21721400  | 0.59354700  |
| O   | 1.69627400  | 2.74819700  | 1.38479800  |
| Al  | -0.33985500 | -0.36247200 | 1.49505500  |
| Al  | -1.51669900 | 1.57286300  | -0.95650100 |
| O   | 1.73584300  | -1.09786600 | -1.45019900 |
| O   | -0.69661400 | -2.48520100 | -2.16739100 |
| Al  | 2.51659600  | -1.20073300 | 0.29342900  |
| O   | 1.68123600  | 1.76407700  | -0.89932700 |
| O   | 3.71111000  | 0.08168900  | 0.39455900  |
| Al  | -1.47336300 | -1.04844900 | -1.55813200 |
| O   | -0.86675000 | 3.18141800  | -0.93090400 |
| O   | -0.61871000 | 0.47266300  | -2.17394400 |
| Al  | 1.07455000  | 0.44444200  | -1.76744700 |
| Al  | 0.40565300  | 2.66096400  | 0.20986900  |
| O   | 1.73053300  | -2.80882300 | 0.35656000  |
| O   | 1.43057200  | -0.13993900 | 1.31593100  |
| Al  | 0.51230000  | -2.39579700 | -0.86368100 |
| Al  | 2.48006600  | 1.29020700  | 0.79453800  |
| O   | -0.75630400 | -1.37703700 | 0.04540900  |
| O   | -2.80882300 | 0.21979400  | -1.19664300 |
| C   | -5.25231600 | 0.23918300  | 0.91549900  |

|   |             |             |             |
|---|-------------|-------------|-------------|
| H | -3.50997500 | 0.06849600  | -0.53111300 |
| H | -5.17292400 | 1.30295100  | 1.11923400  |
| H | -6.06892400 | -0.07137900 | 0.27073900  |
| C | -4.42290000 | -0.63803800 | 1.47603300  |
| H | -4.53395600 | -1.70446400 | 1.30082600  |
| H | -3.62095500 | -0.33694400 | 2.14524300  |
| F | -1.37762600 | -0.11727800 | 2.84697700  |
| O | 0.07161700  | -2.20803000 | 2.37360800  |
| H | 0.31325700  | -2.19998000 | 3.30371800  |
| H | 0.78288100  | -2.64860600 | 1.83864400  |

**A<sub>18</sub>O<sub>12</sub>---C<sub>2</sub>H<sub>5</sub>Cl reactant geometry:**  
 **$\nu_1=33.93\text{ cm}^{-1}$**

|     |             |             |             |
|-----|-------------|-------------|-------------|
| 0 1 |             |             |             |
| O   | -0.17957400 | -1.64551700 | -0.17023900 |
| O   | 2.16280900  | -1.87044300 | -1.66915600 |
| Al  | -0.56687600 | -0.23057700 | -1.13031500 |
| Al  | -0.37887100 | -1.99068500 | 1.63252900  |
| O   | 1.48475400  | 1.85773800  | 1.07257300  |
| O   | -1.17878000 | 2.09209800  | 2.30766300  |
| Al  | 1.66813500  | 2.18392300  | -0.78538000 |
| O   | 2.55634700  | -0.78401300 | 0.53327800  |
| O   | 3.22443800  | 1.46057500  | -1.23742600 |
| Al  | -1.32216400 | 0.36990400  | 1.98321500  |
| O   | 0.98889300  | -3.10107500 | 1.42284700  |
| O   | 0.36082900  | -0.42638900 | 2.40364400  |
| Al  | 1.69821700  | 0.25572500  | 1.60039600  |
| Al  | 1.53920200  | -2.27136000 | -0.02897200 |
| O   | 0.32049300  | 3.29633800  | -0.57612600 |
| O   | 0.92038500  | 0.64697000  | -1.50296400 |
| Al  | -0.33014500 | 2.41073700  | 0.79682400  |
| Al  | 2.55510600  | -0.16549400 | -1.24668400 |
| O   | -1.16453800 | 0.84461600  | 0.16961500  |
| O   | -1.94098000 | -1.28005200 | 2.05357000  |
| C   | -4.67754500 | -0.47082900 | -0.16547900 |
| H   | -5.20544700 | -1.21973900 | -0.75665700 |
| H   | -5.41058100 | 0.02509300  | 0.48078000  |
| H   | -3.94009800 | -0.95802700 | 0.47640000  |
| C   | -4.06122900 | 0.58576900  | -1.02516400 |
| H   | -3.44540800 | 1.29954100  | -0.48843500 |
| H   | -4.74392000 | 1.07300900  | -1.71456300 |
| Cl  | -2.80346000 | -0.19961900 | -2.22340400 |
| O   | -0.18436600 | -1.36584700 | -2.76023600 |
| H   | -0.09267700 | -0.92653200 | -3.61257500 |
| H   | 0.75005400  | -1.69771000 | -2.50055400 |

**Al<sub>8</sub>O<sub>12</sub>---C<sub>2</sub>H<sub>5</sub>Cl TS1 geometry:**

**v1=-381.45 cm<sup>-1</sup>**

0 1

|    |             |             |             |
|----|-------------|-------------|-------------|
| O  | 0.58175900  | -1.44886100 | -0.15742800 |
| O  | -1.77835900 | -2.69944200 | 0.74572000  |
| Al | 0.50827900  | -0.34081000 | 1.22553700  |
| Al | 1.03301900  | -1.17234700 | -1.89695100 |
| O  | -1.86740400 | 1.77590100  | -0.72915700 |
| O  | 0.71281400  | 3.03044200  | -1.36057100 |
| Al | -2.30379500 | 1.43904200  | 1.10216700  |
| O  | -2.16413400 | -1.08878700 | -1.10827500 |
| O  | -3.63254300 | 0.26666600  | 1.04883000  |
| Al | 1.28929400  | 1.37928500  | -1.44648400 |
| O  | 0.05490600  | -2.59391900 | -2.26558300 |
| O  | 0.02911900  | 0.33288300  | -2.39349600 |
| Al | -1.52626300 | 0.40254400  | -1.66539600 |
| Al | -0.86602100 | -2.40536900 | -0.76568500 |
| O  | -1.34558000 | 2.87444500  | 1.43619500  |
| O  | -1.22530500 | -0.01746000 | 1.50305400  |
| Al | -0.33371400 | 2.65112900  | 0.01945000  |
| Al | -2.53537900 | -1.07229600 | 0.75285000  |
| O  | 0.79079400  | 1.18958800  | 0.29620600  |
| O  | 2.40163200  | -0.00151000 | -1.78523800 |
| C  | 4.56279800  | -0.22766900 | -0.17303200 |
| H  | 4.94244000  | -1.22142400 | -0.40313000 |
| H  | 5.06090100  | 0.56575000  | -0.74116800 |
| H  | 3.51752900  | -0.14790800 | -0.77552500 |
| C  | 4.54482400  | 0.08619100  | 1.20549400  |
| H  | 4.55131500  | 1.12003700  | 1.52684100  |
| H  | 4.86945600  | -0.63116500 | 1.94636700  |
| Cl | 2.48299700  | -0.14673200 | 2.41940800  |
| O  | 0.22861300  | -2.04146100 | 2.35695000  |
| H  | 0.02399300  | -1.95529800 | 3.29302300  |
| H  | -0.56328000 | -2.46985300 | 1.89986300  |

**Al<sub>8</sub>O<sub>12</sub>---C<sub>2</sub>H<sub>5</sub>Cl product-1 geometry:**

**v1=23.89 cm<sup>-1</sup>**

0 1

|    |             |             |             |
|----|-------------|-------------|-------------|
| O  | 0.68797100  | -1.38312800 | 0.01273100  |
| O  | -1.76129000 | -2.78010100 | 0.63449900  |
| Al | 0.36640600  | -0.24818000 | 1.39720600  |
| Al | 1.27346900  | -1.19052500 | -1.66583000 |
| O  | -1.84718300 | 1.66706800  | -1.01264600 |

|    |             |             |             |
|----|-------------|-------------|-------------|
| O  | 0.68503000  | 3.07555200  | -1.35312000 |
| Al | -2.51269500 | 1.33895200  | 0.77274900  |
| O  | -1.91757200 | -1.23324100 | -1.30746900 |
| O  | -3.76026100 | 0.09852700  | 0.57148300  |
| Al | 1.34359700  | 1.47213800  | -1.29664000 |
| O  | 0.46187700  | -2.67447600 | -2.08743000 |
| O  | 0.36087100  | 0.27129600  | -2.34151000 |
| Al | -1.29550800 | 0.27811000  | -1.80543900 |
| Al | -0.64373600 | -2.47445400 | -0.70808900 |
| O  | -1.69548400 | 2.84134800  | 1.17416100  |
| O  | -1.41449800 | -0.04118400 | 1.32951100  |
| Al | -0.49750400 | 2.65444900  | -0.08324000 |
| Al | -2.56790500 | -1.18634700 | 0.48926900  |
| O  | 0.66633500  | 1.24209500  | 0.33259100  |
| O  | 2.62174100  | 0.10686500  | -1.53061900 |
| C  | 4.96232700  | 0.50928700  | 0.65877700  |
| H  | 5.49867700  | 1.33145800  | 0.19401800  |
| H  | 4.28351900  | 0.75326100  | 1.47098200  |
| H  | 3.40467900  | 0.01618400  | -0.95134200 |
| C  | 5.15729700  | -0.74966300 | 0.27444700  |
| H  | 4.65028900  | -1.57233400 | 0.76953600  |
| H  | 5.85850900  | -1.00730600 | -0.51352500 |
| Cl | 1.79092600  | 0.26581500  | 2.98923100  |
| O  | 0.02842100  | -2.00791600 | 2.44380500  |
| H  | -0.12664900 | -1.94326200 | 3.39041100  |
| H  | -0.71977700 | -2.49010800 | 1.99594100  |

**Al<sub>8</sub>O<sub>12</sub>---C<sub>2</sub>H<sub>5</sub>Br reactant geometry:**  
**v1=31.64 cm<sup>-1</sup>**

|     |             |             |             |
|-----|-------------|-------------|-------------|
| 0 1 |             |             |             |
| O   | -0.02689800 | -1.10107500 | 1.19941600  |
| O   | 1.97538100  | -2.74068300 | 0.16348200  |
| Al  | -0.53564800 | -0.80726700 | -0.45238800 |
| Al  | 0.11358300  | 0.04104000  | 2.64665200  |
| O   | 1.98047700  | 1.83672600  | -0.80490400 |
| O   | -0.38738400 | 3.34968700  | 0.08203100  |
| Al  | 1.81312900  | 0.65020300  | -2.27479900 |
| O   | 2.82238900  | -0.47394600 | 0.73580100  |
| O   | 3.22531000  | -0.41959100 | -2.17350700 |
| Al  | -0.65229400 | 2.00739000  | 1.18656100  |
| O   | 1.37474800  | -1.07029000 | 3.21385400  |
| O   | 1.04651400  | 1.50985100  | 1.89255000  |
| Al  | 2.23088200  | 1.14078100  | 0.72625600  |
| Al  | 1.66378100  | -1.69068900 | 1.59197700  |

|    |             |             |             |
|----|-------------|-------------|-------------|
| O  | 0.57326000  | 1.76131300  | -2.84462400 |
| O  | 0.88380300  | -0.75974800 | -1.50704100 |
| Al | 0.16671700  | 2.30184200  | -1.22162500 |
| Al | 2.50566300  | -1.37736800 | -0.88634600 |
| O  | -0.82716400 | 0.95524500  | -0.36236400 |
| O  | -1.30760500 | 1.08465600  | 2.53921600  |
| C  | -4.44800100 | 0.70309400  | 0.87133700  |
| H  | -5.19333800 | -0.04796500 | 1.13582800  |
| H  | -4.91798400 | 1.68853300  | 0.97021000  |
| H  | -3.61542100 | 0.65683600  | 1.57689100  |
| C  | -3.99114800 | 0.56820100  | -0.54936900 |
| H  | -3.19004400 | 1.24625200  | -0.82658000 |
| H  | -4.78877600 | 0.56648100  | -1.28655600 |
| Br | -3.11803600 | -1.25527700 | -0.85716500 |
| O  | -0.50973100 | -2.82084000 | -0.71238900 |
| H  | -0.52900000 | -3.15097300 | -1.61757400 |
| H  | 0.44034800  | -2.99977100 | -0.36718200 |

**Al<sub>8</sub>O<sub>12</sub>---C<sub>2</sub>H<sub>5</sub>Br TS1 geometry:**

**v1=-426.70 cm<sup>-1</sup>**

0 1

|    |             |             |             |
|----|-------------|-------------|-------------|
| O  | -0.47643100 | -1.41917700 | -0.06051800 |
| O  | 1.51400300  | -2.38459700 | -1.81130500 |
| Al | -0.54403100 | 0.08365200  | -1.00418000 |
| Al | -0.51973800 | -1.70250500 | 1.73864700  |
| O  | 2.39052000  | 1.35420400  | 0.93209400  |
| O  | 0.12699500  | 2.42839100  | 2.47717600  |
| Al | 2.41245300  | 1.61658800  | -0.96344600 |
| O  | 2.43086000  | -1.48431400 | 0.31846700  |
| O  | 3.58821200  | 0.44004700  | -1.57807200 |
| Al | -0.60780800 | 0.86933900  | 2.16882900  |
| O  | 0.34803300  | -3.20326500 | 1.41454300  |
| O  | 0.70454300  | -0.47950600 | 2.43939100  |
| Al | 2.08226200  | -0.23377400 | 1.44099900  |
| Al | 0.96157600  | -2.56848200 | -0.11984200 |
| O  | 1.56727700  | 3.11632100  | -0.61200600 |
| O  | 1.12305800  | 0.41220800  | -1.55043000 |
| Al | 0.84077400  | 2.48349300  | 0.85549300  |
| Al | 2.43192700  | -0.87722800 | -1.47921600 |
| O  | -0.45537100 | 1.22684900  | 0.39238100  |
| O  | -1.76068400 | -0.51794400 | 2.30264800  |
| C  | -4.23227700 | -0.61288600 | 1.26664400  |
| H  | -4.33630500 | -1.66755800 | 1.53795900  |
| H  | -4.74638300 | 0.06107600  | 1.95074400  |
| H  | -3.06570500 | -0.50190600 | 1.61601500  |

|    |             |             |             |
|----|-------------|-------------|-------------|
| C  | -4.53811500 | -0.39651700 | -0.09605000 |
| H  | -5.16761600 | 0.42936000  | -0.39822600 |
| H  | -4.47377900 | -1.21173300 | -0.80517100 |
| Br | -2.85773900 | 0.83150400  | -1.58120400 |
| O  | -0.69643700 | -1.15936800 | -2.64113500 |
| H  | -0.67115200 | -0.77495000 | -3.52303800 |
| H  | 0.12112200  | -1.74337000 | -2.53026000 |

**Al<sub>8</sub>O<sub>12</sub>---C<sub>2</sub>H<sub>5</sub>Br product-1 geometry:**  
**v1=18.43 cm<sup>-1</sup>**

|     |             |             |             |
|-----|-------------|-------------|-------------|
| 0 1 |             |             |             |
| O   | 0.46962300  | 0.82978800  | -1.17168800 |
| O   | -1.77000500 | 0.25365200  | -2.89896400 |
| Al  | 0.49666200  | -0.91543500 | -0.65747300 |
| Al  | 0.64369000  | 2.39860900  | -0.32949200 |
| O   | -2.21091000 | 0.03977100  | 1.81902700  |
| O   | 0.17908900  | 0.37832700  | 3.45695900  |
| Al  | -2.43794100 | -1.58842900 | 0.80578000  |
| O   | -2.37374700 | 1.38408900  | -0.76681200 |
| O   | -3.70587200 | -1.21744100 | -0.37331000 |
| Al  | 0.82165800  | 1.07601600  | 2.00493300  |
| O   | -0.25452200 | 3.15543500  | -1.61677200 |
| O   | -0.39171600 | 2.24775200  | 1.19476300  |
| Al  | -1.87406400 | 1.39676900  | 0.86683200  |
| Al  | -1.00086700 | 1.59432500  | -2.02937500 |
| O   | -1.53873600 | -2.33517400 | 2.11702200  |
| O   | -1.24842200 | -1.32532600 | -0.58710900 |
| Al  | -0.67177300 | -0.86927200 | 2.50524300  |
| Al  | -2.57736500 | -0.39570700 | -1.43602300 |
| O   | 0.54945900  | -0.45640600 | 1.14035400  |
| O   | 1.99457600  | 2.08876500  | 0.93203500  |
| C   | 4.89634100  | 0.70817800  | 0.61989200  |
| H   | 5.38078100  | 1.08581200  | 1.51538800  |
| H   | 4.51128900  | -0.30691900 | 0.65071400  |
| H   | 2.89702500  | 1.79676400  | 0.69304100  |
| C   | 4.81195500  | 1.44133600  | -0.48716600 |
| H   | 4.36163000  | 1.04145800  | -1.39059700 |
| H   | 5.22358800  | 2.44456500  | -0.54315500 |
| Br  | 2.40934000  | -2.32119600 | -0.64301600 |
| O   | 0.40141500  | -1.26404800 | -2.70152400 |
| H   | 0.48244500  | -2.16774800 | -3.02013700 |
| H   | -0.43527400 | -0.84201400 | -3.04341500 |

**Al<sub>8</sub>O<sub>12</sub>---C<sub>2</sub>H<sub>5</sub>I reactant geometry:**  
**v1=26.24 cm<sup>-1</sup>**

|     |             |             |             |
|-----|-------------|-------------|-------------|
| 0 1 |             |             |             |
| O   | 0.50629800  | 0.94697800  | -0.58529800 |
| O   | -0.80630000 | 0.85029800  | -3.23717400 |
| Al  | 0.38551500  | -0.78544100 | -0.16064100 |
| Al  | 0.15337300  | 2.37932200  | 0.57850100  |
| O   | -3.05621800 | -0.46867300 | 0.77220200  |
| O   | -1.70894700 | -0.16822200 | 3.35969800  |
| Al  | -2.56458900 | -1.76683100 | -0.49953200 |
| O   | -2.33191600 | 1.36881400  | -1.35415000 |
| O   | -3.28729600 | -1.30359000 | -2.03428800 |
| Al  | -0.51874300 | 0.85200300  | 2.52831900  |
| O   | -0.16443400 | 3.30991900  | -0.87989300 |
| O   | -1.53334100 | 1.93500200  | 1.34738600  |
| Al  | -2.60999500 | 1.12553000  | 0.30606900  |
| Al  | -0.54619300 | 1.87848000  | -1.83443600 |
| O   | -1.98071200 | -2.70559700 | 0.92150500  |
| O   | -0.96969100 | -1.19145000 | -1.22396100 |
| Al  | -1.84711800 | -1.25914900 | 1.98539800  |
| Al  | -1.97277500 | -0.16902000 | -2.40200000 |
| O   | -0.19473700 | -0.64208000 | 1.48786800  |
| O   | 0.80724700  | 1.96084900  | 2.16235900  |
| C   | 4.09254400  | 1.70268600  | 0.75655900  |
| H   | 3.22840600  | 1.71285700  | 1.42495300  |
| H   | 4.37215700  | 2.74285600  | 0.55228100  |
| H   | 4.93355800  | 1.22830900  | 1.26416800  |
| C   | 3.78220000  | 1.04974800  | -0.56095200 |
| I   | 3.20139400  | -1.06452000 | -0.29800000 |
| H   | 4.62691500  | 0.98579200  | -1.24149300 |
| H   | 2.90861200  | 1.45915000  | -1.05973500 |
| O   | 0.54223100  | -2.79713000 | 0.16899500  |
| H   | 0.60116500  | -3.34560700 | -0.62170900 |
| H   | -0.40380700 | -2.95296800 | 0.53808500  |

**Al<sub>8</sub>O<sub>12</sub>---C<sub>2</sub>H<sub>5</sub>I TS1 geometry:**  
**v1=-530.99 cm<sup>-1</sup>**

|     |             |             |             |
|-----|-------------|-------------|-------------|
| 0 1 |             |             |             |
| O   | 0.26795300  | -0.35854900 | -1.20303400 |
| O   | -1.47227700 | -2.61206000 | -1.95660200 |
| Al  | 0.42140900  | -0.65467600 | 0.57457000  |
| Al  | 0.18453400  | 1.22765600  | -2.08709500 |



|    |             |             |             |
|----|-------------|-------------|-------------|
| O  | -2.80665800 | 0.94139600  | 0.94317600  |
| O  | -1.00618600 | 3.16252100  | 1.50794400  |
| Al | -2.55127900 | -0.80182300 | 1.65082500  |
| O  | -2.60347100 | -0.42904300 | -1.60937200 |
| O  | -3.57767800 | -1.88911500 | 0.73104500  |
| Al | -0.06318300 | 2.55726300  | 0.14739100  |
| O  | -0.45567800 | 0.35256200  | -3.46129400 |
| O  | -1.25253800 | 2.12017900  | -1.22179300 |
| Al | -2.48730300 | 1.02347100  | -0.74150300 |
| Al | -0.97209600 | -1.00074400 | -2.44035900 |
| O  | -1.72585000 | 0.05017600  | 2.99935400  |
| O  | -1.14199100 | -1.50618700 | 0.70170300  |
| Al | -1.38798500 | 1.51560000  | 2.03176300  |
| Al | -2.38806800 | -2.02510900 | -0.57674800 |
| O  | 0.11825100  | 1.01497900  | 1.09769300  |
| O  | 1.19551800  | 2.39529700  | -1.14037500 |
| C  | 3.77266800  | 2.23068600  | -0.49444000 |
| H  | 2.56875700  | 2.16727100  | -0.77372300 |
| H  | 4.19738200  | 2.45905400  | -1.47186900 |
| H  | 3.70249400  | 3.09971400  | 0.16488500  |
| C  | 4.36932500  | 1.12315400  | 0.14597100  |
| I  | 3.04236700  | -1.28693200 | 0.31068900  |
| H  | 4.41462300  | 1.07484000  | 1.22614900  |
| H  | 5.09194100  | 0.50860500  | -0.37378300 |
| O  | 0.65458200  | -1.05420200 | 2.58089500  |
| H  | 0.76356400  | -1.96473200 | 2.87312400  |
| H  | -0.21634500 | -0.70530500 | 2.95982800  |

**Al<sub>8</sub>O<sub>12</sub>---C<sub>2</sub>H<sub>5</sub>I product-1 geometry:**  
**v1=22.26 cm<sup>-1</sup>**

|     |             |             |             |
|-----|-------------|-------------|-------------|
| 0 1 |             |             |             |
| O   | -0.37234900 | 0.02238600  | 1.20216100  |
| O   | 1.24752800  | -2.09155500 | 2.52712100  |
| Al  | -0.49747000 | -0.75693400 | -0.47773200 |
| Al  | -0.23710500 | 1.70743000  | 1.76297600  |
| O   | 2.83205400  | 0.72809500  | -0.99585700 |
| O   | 1.15923700  | 2.76946100  | -2.17645800 |
| Al  | 2.57888300  | -1.14083000 | -1.31738800 |
| O   | 2.45158000  | -0.04399000 | 1.79309000  |
| O   | 3.52063700  | -2.00146100 | -0.11305200 |
| Al  | 0.15743000  | 2.49644500  | -0.77702100 |
| O   | 0.27735800  | 1.15354800  | 3.32355600  |
| O   | 1.18714700  | 2.38357800  | 0.75610200  |
| Al  | 2.41470900  | 1.15959800  | 0.60434100  |

|    |             |             |             |
|----|-------------|-------------|-------------|
| Al | 0.76984800  | -0.41484200 | 2.62872700  |
| O  | 1.89425800  | -0.59542500 | -2.88186900 |
| O  | 1.10066800  | -1.55669900 | -0.32025100 |
| Al | 1.50165600  | 1.02782600  | -2.28568300 |
| Al | 2.24688900  | -1.83720300 | 1.10540500  |
| O  | -0.07383400 | 0.80430700  | -1.31023400 |
| O  | -1.17567600 | 2.75894600  | 0.51251000  |
| C  | -4.37320500 | 2.36476200  | 0.60682400  |
| H  | -2.13482000 | 2.67325200  | 0.34069300  |
| H  | -4.34036300 | 1.37624800  | 1.05498500  |
| H  | -4.62145500 | 3.19771000  | 1.25759400  |
| C  | -4.16121800 | 2.53367700  | -0.69562900 |
| I  | -2.88753700 | -1.69756900 | -0.18010300 |
| H  | -4.22957600 | 3.51140500  | -1.16321300 |
| H  | -3.95083100 | 1.68782600  | -1.34299100 |
| O  | -0.56303800 | -1.48993900 | -2.42188300 |
| H  | -0.85232400 | -2.39548200 | -2.56913800 |
| H  | 0.33786100  | -1.33981800 | -2.82626400 |

**Al<sub>8</sub>O<sub>12</sub>---C<sub>2</sub>H<sub>5</sub>F TS2 geometry:**  
**v1=-273.39 cm<sup>-1</sup>**

|     |             |             |             |
|-----|-------------|-------------|-------------|
| 0 1 |             |             |             |
| O   | -0.76253400 | 1.22885500  | 0.58964900  |
| O   | 1.62936300  | 2.70304400  | 1.47513600  |
| Al  | -0.43818500 | -0.38151100 | 1.42327300  |
| Al  | -1.51475000 | 1.57076800  | -1.05606900 |
| O   | 1.76097300  | -1.11357600 | -1.39100500 |
| O   | -0.71313600 | -2.39728000 | -2.25818100 |
| Al  | 2.42559700  | -1.24971900 | 0.38141500  |
| O   | 1.73299800  | 1.72745900  | -0.80583600 |
| O   | 3.64528200  | 0.00007800  | 0.56880900  |
| Al  | -1.51509600 | -0.94011800 | -1.67177500 |
| O   | -0.81857000 | 3.17320300  | -0.94987500 |
| O   | -0.49286200 | 0.52089700  | -2.24217000 |
| Al  | 1.15448100  | 0.44687300  | -1.75541400 |
| Al  | 0.39801400  | 2.63670400  | 0.22512300  |
| O   | 1.56870400  | -2.82663400 | 0.39552700  |
| O   | 1.33161500  | -0.17576900 | 1.40188300  |
| Al  | 0.44344200  | -2.36652300 | -0.91825500 |
| Al  | 2.42555200  | 1.24100400  | 0.90979500  |
| O   | -0.81955600 | -1.36518000 | -0.02753600 |
| O   | -2.77332200 | 0.28955300  | -1.26045400 |
| C   | -4.73830200 | -0.13627600 | 1.47767100  |
| H   | -5.02714500 | -1.12256700 | 1.83900900  |

|   |             |             |            |
|---|-------------|-------------|------------|
| H | -5.31293300 | 0.05573200  | 0.55521100 |
| H | -4.99845700 | 0.65254000  | 2.18326100 |
| C | -3.35410900 | -0.06834700 | 1.04327900 |
| H | -2.83783500 | 0.87163500  | 1.01443300 |
| H | -2.85616300 | -0.95069400 | 0.68746400 |
| F | -1.85295800 | -0.27109400 | 2.53349500 |
| O | -0.09840800 | -2.19495100 | 2.35192700 |
| H | 0.22397200  | -2.21187700 | 3.25752900 |
| H | 0.58755300  | -2.63197700 | 1.75775900 |

**Al<sub>8</sub>O<sub>12</sub>---C<sub>2</sub>H<sub>5</sub>F product-2 geometry:**  
 **$\nu_1=38.07 \text{ cm}^{-1}$**

0 1

|    |             |             |             |
|----|-------------|-------------|-------------|
| O  | -0.34170500 | 1.34701200  | 0.85737700  |
| O  | 2.43746000  | 2.38826900  | 1.05562800  |
| Al | -0.04799500 | -0.31344700 | 1.64845900  |
| Al | -1.38598700 | 1.90011600  | -0.46874300 |
| O  | 1.12145700  | -1.28125200 | -1.70405700 |
| O  | -1.61905100 | -2.18825900 | -1.82674500 |
| Al | 2.25472600  | -1.59445700 | -0.19489200 |
| O  | 1.71474900  | 1.52081500  | -1.16010500 |
| O  | 3.65195400  | -0.54697900 | -0.37777000 |
| Al | -1.96240100 | -0.66431500 | -1.05239800 |
| O  | -0.46700600 | 3.36594700  | -0.59711600 |
| O  | -1.01330000 | 0.70637700  | -1.85531800 |
| Al | 0.69557000  | 0.36491500  | -1.85820300 |
| Al | 0.91477200  | 2.58056600  | 0.22004100  |
| O  | 1.22729400  | -3.03992800 | 0.05306700  |
| O  | 1.63938000  | -0.40093800 | 1.04576100  |
| Al | -0.14582900 | -2.36596400 | -0.84251200 |
| Al | 2.78419700  | 0.84145200  | 0.29704400  |
| O  | -0.96960000 | -1.18248200 | 0.34103300  |
| O  | -2.92147700 | 0.80856300  | -0.38240100 |
| C  | -4.64403900 | -0.55238000 | 0.64641200  |
| H  | -3.99294000 | -1.43052000 | 0.72586500  |
| H  | -5.21359600 | -0.60296800 | -0.28476100 |
| H  | -5.35081400 | -0.61220100 | 1.47660700  |
| C  | -3.84628000 | 0.72517700  | 0.73422900  |
| H  | -4.49703900 | 1.60008500  | 0.68023000  |
| H  | -3.27240100 | 0.76588900  | 1.66412000  |
| F  | -0.65387000 | 0.05985600  | 3.21096400  |
| O  | 0.21587700  | -2.24035100 | 2.40561500  |
| H  | 0.65667800  | -2.30759500 | 3.25687800  |
| H  | 0.69690900  | -2.77779800 | 1.72444100  |

**Al<sub>8</sub>O<sub>12</sub>-C<sub>2</sub>H<sub>5</sub>Cl TS2 geometry:****v1=-270.16 cm<sup>-1</sup>**

0 1

|    |             |             |             |
|----|-------------|-------------|-------------|
| O  | 0.70608700  | -1.36967700 | -0.20652100 |
| O  | -1.64388600 | -2.80481400 | 0.48736100  |
| Al | 0.47728500  | -0.39162900 | 1.27741900  |
| Al | 1.20238900  | -0.95364200 | -1.92650700 |
| O  | -1.89390300 | 1.74713300  | -0.67848900 |
| O  | 0.64047400  | 3.15781500  | -1.10426000 |
| Al | -2.40274700 | 1.26702000  | 1.09849900  |
| O  | -2.02603500 | -1.09350400 | -1.26758200 |
| O  | -3.66678600 | 0.04036900  | 0.89188000  |
| Al | 1.29941800  | 1.55125200  | -1.30617600 |
| O  | 0.32006800  | -2.40055900 | -2.40945600 |
| O  | 0.12931000  | 0.51854700  | -2.36216200 |
| Al | -1.45332200 | 0.46426300  | -1.69597100 |
| Al | -0.67066900 | -2.35662400 | -0.94614400 |
| O  | -1.51881300 | 2.70847500  | 1.57916100  |
| O  | -1.27661000 | -0.16341500 | 1.45320200  |
| Al | -0.43341300 | 2.63017300  | 0.20309300  |
| Al | -2.49176300 | -1.22294600 | 0.56535400  |
| O  | 0.75623200  | 1.20588600  | 0.42487300  |
| O  | 2.51051500  | 0.26664700  | -1.68863400 |
| C  | 4.93245500  | -0.10375800 | 0.45181000  |
| H  | 5.30463000  | -1.07759700 | 0.76781800  |
| H  | 5.37479500  | 0.70018500  | 1.03919700  |
| H  | 5.24288700  | 0.04540800  | -0.59368400 |
| C  | 3.47373000  | -0.03818000 | 0.42174000  |
| H  | 2.96727600  | 0.90297300  | 0.50823800  |
| H  | 2.89597700  | -0.92415200 | 0.23804600  |
| Cl | 2.36859800  | -0.21619600 | 2.63360100  |
| O  | 0.23096300  | -2.19943900 | 2.21356500  |
| H  | 0.04920100  | -2.24439100 | 3.15671300  |
| H  | -0.53227000 | -2.62546300 | 1.70328300  |

**Al<sub>8</sub>O<sub>12</sub>---C<sub>2</sub>H<sub>5</sub>Cl product-2 geometry:****v1=39.14 cm<sup>-1</sup>**

0 1

|    |             |             |             |
|----|-------------|-------------|-------------|
| O  | 0.93046100  | -1.19344000 | 0.21425000  |
| O  | -1.29912100 | -3.02383000 | 0.24974300  |
| Al | 0.13551600  | -0.21895700 | 1.52777400  |
| Al | 1.81598600  | -0.79246700 | -1.28717600 |

|    |             |             |             |
|----|-------------|-------------|-------------|
| O  | -1.83845100 | 1.44336300  | -1.25274600 |
| O  | 0.40700000  | 3.28400000  | -1.00086500 |
| Al | -2.79078700 | 0.89052400  | 0.33686900  |
| O  | -1.32323400 | -1.40045800 | -1.63548000 |
| O  | -3.72464400 | -0.52854800 | -0.16081600 |
| Al | 1.31699100  | 1.81603900  | -0.84459500 |
| O  | 1.38865900  | -2.36099300 | -1.91900200 |
| O  | 0.81672800  | 0.53278500  | -2.10673600 |
| Al | -0.88984500 | 0.22328600  | -1.94203900 |
| Al | -0.00015300 | -2.44331800 | -0.80966600 |
| O  | -2.36464000 | 2.48220100  | 0.94529600  |
| O  | -1.59960100 | -0.31464600 | 1.08016100  |
| Al | -0.91644800 | 2.58627200  | -0.02586100 |
| Al | -2.32928700 | -1.58283500 | -0.01952300 |
| O  | 0.37076700  | 1.37023700  | 0.59403900  |
| O  | 2.84045200  | 0.70942000  | -0.80681600 |
| C  | 4.61151800  | -0.60990700 | 0.19679700  |
| H  | 3.94057300  | -1.44186400 | 0.43881400  |
| H  | 5.39579800  | -0.61110500 | 0.95653700  |
| H  | 5.08357600  | -0.78843500 | -0.77270300 |
| C  | 3.87317600  | 0.70523500  | 0.21664800  |
| H  | 4.54443000  | 1.53801800  | -0.00170100 |
| H  | 3.39942800  | 0.87228300  | 1.18791000  |
| Cl | 1.13580200  | 0.41216900  | 3.37470100  |
| O  | -0.09716900 | -2.07646200 | 2.42850600  |
| H  | -0.44833000 | -2.10919200 | 3.32274800  |
| H  | -0.63557000 | -2.64866300 | 1.81637400  |

**Al<sub>8</sub>O<sub>12</sub>---C<sub>2</sub>H<sub>5</sub>Br TS2 geometry:**  
**v1=-275.49 cm<sup>-1</sup>**

|     |             |             |             |
|-----|-------------|-------------|-------------|
| 0 1 |             |             |             |
| O   | 0.41955100  | -0.07310200 | -1.45748500 |
| O   | -1.65540100 | -1.83625800 | -2.26709200 |
| Al  | 0.57107500  | -1.04017900 | 0.04264200  |
| Al  | 0.43488900  | 1.73443300  | -1.79174600 |
| O   | -2.24762600 | 0.96424400  | 1.47181700  |
| O   | 0.06994900  | 2.52430600  | 2.35011000  |
| Al  | -2.26958900 | -0.92196500 | 1.77214800  |
| O   | -2.50235300 | 0.30712400  | -1.34800800 |
| O   | -3.53140900 | -1.54141200 | 0.69069100  |
| Al  | 0.66606600  | 2.22366600  | 0.73543600  |
| O   | -0.52982200 | 1.36333400  | -3.21840100 |
| O   | -0.72976000 | 2.44857800  | -0.50831700 |

|    |             |             |             |
|----|-------------|-------------|-------------|
| Al | -2.07999200 | 1.45119400  | -0.14364400 |
| Al | -1.09817700 | -0.15387000 | -2.51190700 |
| O  | -1.30049200 | -0.55386400 | 3.19165900  |
| O  | -1.07701500 | -1.53277400 | 0.49002400  |
| Al | -0.61517800 | 0.89539100  | 2.48002500  |
| Al | -2.47156100 | -1.47503800 | -0.70781800 |
| O  | 0.60623200  | 0.42174300  | 1.14306400  |
| O  | 1.74410700  | 2.34628000  | -0.70946900 |
| C  | 4.64220500  | 1.08258400  | -0.45229300 |
| H  | 5.13876700  | 0.51998300  | -1.24263800 |
| H  | 5.21718700  | 1.04745500  | 0.47259900  |
| H  | 4.59608900  | 2.13327000  | -0.77382200 |
| C  | 3.24878500  | 0.67368100  | -0.26134300 |
| H  | 2.76402100  | 0.80584900  | 0.68555600  |
| H  | 2.68140200  | 0.28456500  | -1.08552800 |
| Br | 2.91810600  | -1.76932500 | 0.61643900  |
| O  | 0.60096800  | -2.65873500 | -1.21877500 |
| H  | 0.66343900  | -3.55210800 | -0.86798700 |
| H  | -0.26392500 | -2.56313200 | -1.73701200 |

**Al<sub>8</sub>O<sub>12</sub>---C<sub>2</sub>H<sub>5</sub>Br product-2 geometry:**  
**v1=37.41 cm<sup>-1</sup>**

|     |             |             |             |
|-----|-------------|-------------|-------------|
| 0 1 |             |             |             |
| O   | -0.71381700 | -0.69491600 | -1.09825000 |
| O   | 1.50044300  | -0.59635500 | -2.94341400 |
| Al  | -0.41111700 | 1.04548400  | -0.66489900 |
| Al  | -1.13356700 | -2.17353700 | -0.18326300 |
| O   | 2.20099200  | -0.29133100 | 1.73618800  |
| O   | -0.12170200 | -0.13268700 | 3.48802000  |
| Al  | 2.66527200  | 1.23336500  | 0.64050900  |
| O   | 1.99596100  | -1.73669800 | -0.78791100 |
| O   | 3.78755000  | 0.59657600  | -0.57163500 |
| Al  | -0.94824300 | -0.75604800 | 2.09659800  |
| O   | -0.44608200 | -3.12742700 | -1.47089400 |
| O   | -0.01400800 | -2.15892400 | 1.29020800  |
| Al  | 1.58007000  | -1.60113400 | 0.86364800  |
| Al  | 0.54904800  | -1.74424900 | -1.98217800 |
| O   | 1.98188400  | 2.17669400  | 1.95484300  |
| O   | 1.38057200  | 1.13873500  | -0.68768000 |
| Al  | 0.88727500  | 0.90710200  | 2.44528300  |
| Al  | 2.47906100  | -0.04812200 | -1.54613400 |
| O   | -0.45604700 | 0.67137300  | 1.15382700  |
| O   | -2.34264100 | -1.55850300 | 1.11787800  |
| C   | -4.25689500 | -1.68374100 | -0.36385500 |

|    |             |             |             |
|----|-------------|-------------|-------------|
| H  | -5.23729300 | -1.25783000 | -0.58666600 |
| H  | -4.39092400 | -2.75044400 | -0.16714600 |
| H  | -3.64661500 | -1.54933400 | -1.26436300 |
| C  | -3.64127500 | -0.97794400 | 0.81849500  |
| H  | -4.25809500 | -1.09246000 | 1.71188600  |
| H  | -3.50566600 | 0.08709100  | 0.61061300  |
| Br | -2.07260900 | 2.73614800  | -0.63472100 |
| O  | -0.35283900 | 1.29444300  | -2.72551900 |
| H  | -0.29359600 | 2.18449700  | -3.08447500 |
| H  | 0.37900300  | 0.71835600  | -3.08209500 |

**Al<sub>8</sub>O<sub>12</sub>---C<sub>2</sub>H<sub>5</sub>I TS2 geometry:**  
**v1=-293.07 cm<sup>-1</sup>**

|     |             |             |             |
|-----|-------------|-------------|-------------|
| 0 1 |             |             |             |
| O   | -0.36038700 | 0.23637900  | 1.20088200  |
| O   | 1.18784900  | -1.67817400 | 2.85161500  |
| Al  | -0.50074700 | -0.78538800 | -0.30873700 |
| Al  | -0.07095300 | 2.05072000  | 1.39531400  |
| O   | 2.85242400  | 0.31617700  | -1.15294100 |
| O   | 1.24295600  | 2.26370600  | -2.60892500 |
| Al  | 2.46142300  | -1.53577400 | -1.12128100 |
| O   | 2.51168300  | 0.09182500  | 1.72413500  |
| O   | 3.38755500  | -2.23702300 | 0.19509200  |
| Al  | 0.25670000  | 2.34669900  | -1.15226600 |
| O   | 0.44871100  | 1.71022800  | 3.02798600  |
| O   | 1.43039800  | 2.38141300  | 0.30758800  |
| Al  | 2.55695900  | 1.08493900  | 0.35034500  |
| Al  | 0.82325900  | 0.02362300  | 2.63646700  |
| O   | 1.70934400  | -1.22535900 | -2.72382500 |
| O   | 0.99341500  | -1.70271900 | -0.02487300 |
| Al  | 1.47868300  | 0.52262800  | -2.42074900 |
| Al  | 2.17785300  | -1.76077700 | 1.40167000  |
| O   | -0.07452300 | 0.55755800  | -1.41613100 |
| O   | -0.99640800 | 2.83409900  | 0.05400900  |
| C   | -4.04010500 | 2.30157500  | -0.17640500 |
| H   | -4.56484400 | 2.13783600  | -1.11732800 |
| H   | -3.72103800 | 3.35260800  | -0.15315400 |
| H   | -4.70910800 | 2.14184200  | 0.66876100  |
| C   | -2.81014100 | 1.50609700  | -0.07452100 |
| I   | -3.18258900 | -1.26282100 | 0.02376500  |
| H   | -2.42320700 | 1.21504400  | 0.88208200  |
| H   | -2.26884800 | 1.22816000  | -0.95872500 |
| O   | -0.72467300 | -1.88429100 | -2.02985400 |

|   |             |             |             |
|---|-------------|-------------|-------------|
| H | -0.96405700 | -2.81506500 | -1.98711400 |
| H | 0.18176100  | -1.79419000 | -2.47651800 |

**Al<sub>8</sub>O<sub>12</sub>---C<sub>2</sub>H<sub>5</sub>I product-2 geometry:**  
**v1=34.23 cm<sup>-1</sup>**

|     |             |             |             |
|-----|-------------|-------------|-------------|
| 0 1 |             |             |             |
| O   | -0.54962300 | 0.38491700  | 1.01853100  |
| O   | 0.74333600  | -1.29372200 | 3.10786900  |
| Al  | -0.56913000 | -0.86725100 | -0.35261200 |
| Al  | -0.33257400 | 2.15377400  | 1.05969400  |
| O   | 2.90670900  | 0.21620700  | -0.87480800 |
| O   | 1.55138400  | 1.87521900  | -2.81255200 |
| Al  | 2.53323700  | -1.64519100 | -0.65024500 |
| O   | 2.18665800  | 0.36534600  | 1.94681600  |
| O   | 3.27077700  | -2.13892300 | 0.86281800  |
| Al  | 0.39119400  | 2.09873300  | -1.53124900 |
| O   | -0.02434200 | 2.08111700  | 2.76554400  |
| O   | 1.23936300  | 2.41472600  | 0.08004300  |
| Al  | 2.37029700  | 1.14455800  | 0.45626500  |
| Al  | 0.40204300  | 0.35352800  | 2.63874700  |
| O   | 2.06021000  | -1.57625000 | -2.37797400 |
| O   | 0.93086700  | -1.65624500 | 0.23580900  |
| Al  | 1.74827600  | 0.16934800  | -2.35056000 |
| Al  | 1.89895900  | -1.54156800 | 1.80889500  |
| O   | 0.06831200  | 0.33969300  | -1.55658100 |
| O   | -1.04896800 | 2.80234600  | -0.56220300 |
| C   | -3.28381500 | 3.00291800  | 0.35106400  |
| H   | -4.34753800 | 2.99780800  | 0.10489000  |
| H   | -3.04923300 | 3.96631600  | 0.81081300  |
| H   | -3.13187900 | 2.19700800  | 1.07817600  |
| C   | -2.46381300 | 2.77164500  | -0.89305100 |
| I   | -3.05077100 | -1.53639400 | -0.08464500 |
| H   | -2.69800100 | 1.79847800  | -1.33262500 |
| H   | -2.63775100 | 3.55314900  | -1.63531500 |
| O   | -0.49787600 | -2.15849600 | -1.97584300 |
| H   | -0.85211700 | -3.04773200 | -1.88071200 |
| H   | 0.44879600  | -2.18811900 | -2.29305500 |
